# Supplementary material for: A worldwide study of subcortical shape as a marker for clinical staging in Parkinson’s disease
Source: PubMed Central journal article supplement (PMC11574005; doi:10.1038/s41531-024-00825-9), 2024-11-19
Supplement: 41531_2024_825_MOESM1_ESM.pdf [file 41531_2024_825_MOESM1_ESM.pdf]

## Supplemental Online Content

|                                                                                                                                           |    |
|-------------------------------------------------------------------------------------------------------------------------------------------|----|
| Table S1. Literature overview of studies performing shape analysis in Parkinson's disease between 2012-2022                               | 2  |
| Table S2. Demographics complete sample per cohort                                                                                         | 5  |
| Table S3. Comparison complete sample PD vs controls                                                                                       | 7  |
| Table S4. Sample size by ROI and number of excluded failed segmentations                                                                  | 7  |
| Table S5. Hoehn & Yahr Stage Characteristics                                                                                              | 7  |
| Table S6. MatchIT controls selection and overlap between Hoehn and Yahr stage analyses                                                    | 8  |
| Table S7A-D. Results HY-control comparison                                                                                                | 9  |
| A - HY1 vs controls                                                                                                                       | 9  |
| B - HY2 vs controls                                                                                                                       | 9  |
| C - HY3 vs controls                                                                                                                       | 9  |
| D - HY4-5 vs controls                                                                                                                     | 10 |
| Table S8. Sample characteristics subgroup analysis                                                                                        | 11 |
| Table S9. Pearson's correlation tests between clinical variables of interest                                                              | 11 |
| Table S10. Results time since diagnosis analysis                                                                                          | 11 |
| Table S11. Results MoCA analysis                                                                                                          | 12 |
| Table S12. Results MDS-UPDRS3 OFF analysis                                                                                                | 12 |
| Table S13. Machine learning model comparison                                                                                              | 13 |
| Table S14A-D. Results k-means clustering on thalamus vertices of HY1 + HY2 participants                                                   | 13 |
| A - K=2 Sample descriptives                                                                                                               | 13 |
| B - K=2 contribution of cohorts to cluster in percentages                                                                                 | 14 |
| C - K=3 Sample descriptives                                                                                                               | 15 |
| D - K=3 contribution of cohorts to cluster in percentages                                                                                 | 16 |
| Table S15. Cohort characteristics                                                                                                         | 18 |
| Table S16A-H. Results Jacobian Determinant                                                                                                | 23 |
| A - Complete sample PD vs controls                                                                                                        | 23 |
| B - HY1 vs controls                                                                                                                       | 23 |
| C - HY2 vs controls                                                                                                                       | 23 |
| D - HY3 vs controls                                                                                                                       | 24 |
| E - HY45 vs controls                                                                                                                      | 24 |
| F - Time since diagnosis in PD                                                                                                            | 25 |
| G - MoCA in PD                                                                                                                            | 25 |
| H - MDS-UPDRS3 Off in PD                                                                                                                  | 26 |
| Figure S1. Flowchart of data inclusion.                                                                                                   | 27 |
| Figure S2A-F. Mass univariate analysis: significant vertex-wise differences in thickness between people with PD and controls.             | 28 |
| Figure S3A-B. Group differences in time since diagnosis and MoCA across HY stage.                                                         | 29 |
| Figure S4A-C. Pattern coherence analysis with spin permutation tests.                                                                     | 30 |
| Figure S5A-B. Hippocampal subregions on the ordinal classification maps.                                                                  | 31 |
| Figure S6A-C. Machine learning binary classification of HY stages versus each other based on the thickness of subcortical structures.     | 32 |
| Figure S7A-C. Machine learning: binary classification maps for HY stages versus controls.                                                 | 33 |
| Figure S8A-C. Machine learning: One-against-All classifications of the HY stages.                                                         | 34 |
| Figure S9A-E. Machine learning: model comparison One-against-All and Orbit.                                                               | 35 |
| Figure S10A-D. Caudate nucleus medial curve discrepancies along its longitudinal axis.                                                    | 36 |
| Figure S11A-C. K-means clustering: determining optimal k                                                                                  | 38 |
| Figure S12. World map of the ENIGMA-Parkinson's Disease Datasets.                                                                         | 40 |
| Figure S13. The ENIGMA-Shape Pipeline.                                                                                                    | 41 |
| Figure S14A-H. Mass univariate analysis: significant vertex-wise differences in Jacobian determinant between people with PD and controls. | 42 |
| Figure S15A-C. Comparison of log Jacobian versus thickness effects.                                                                       | 43 |
| Supplementary References (cited in this supplement)                                                                                       | 44 |

**Table S1. Literature overview of studies performing shape analysis in Parkinson's disease between 2012-2022**

| Study                | Shape analysis approach    | Study population                                                                                               | Key shape deviations                                                                           | Comments                                                                                                                                                                     |
|----------------------|----------------------------|----------------------------------------------------------------------------------------------------------------|------------------------------------------------------------------------------------------------|------------------------------------------------------------------------------------------------------------------------------------------------------------------------------|
| Baggio et al 2015    | Case-control comparison    | 62 PD compared to 31 HC                                                                                        | No significant shape differences                                                               |                                                                                                                                                                              |
| Caligiuri et al 2016 | DAT-SPECT based comparison | 23 PD with unilateral abnormal ligand uptake in putamen** compared to 30 HC                                    | Shape differences in ipsilateral putamen                                                       | Only putamen included as region of interest<br><br>Shape differences did not correlate with clinical variables (age onset, disease duration, UPDRS-ME)                       |
|                      |                            | 19 PD with bilateral abnormal ligand uptake in putamen** compared to 30 HC                                     | Shape differences in bilateral putamen                                                         |                                                                                                                                                                              |
| Chung et al 2017     | Dementia                   | 74 PD with MCI compared to 108 PD without MCI                                                                  | Shape contractions in bilateral thalamus, right caudate, right hippocampus                     |                                                                                                                                                                              |
| D'Cruz et al 2021    | PD subtype comparison      | 12 PD with freezing of gait and 9 PD converting to freezing of gait compared to 36 PD without freezing of gait | Shape expansions in bilateral thalamus                                                         |                                                                                                                                                                              |
| Devignes et al 2021  | Dementia                   | 73 PD with MCI compared to 41 PD without MCI                                                                   | Shape differences in caudate nucleus, hippocampus, thalamus                                    | Only caudate nucleus, hippocampus, thalamus included as regions of interest                                                                                                  |
| Garg et al 2015      | Case-control comparison    | 55 PD compared to 54 HC                                                                                        | Shape contractions in left thalamus, bilateral caudate nucleus                                 | Shape analysis performed in two data sets with overlapping results                                                                                                           |
|                      | Case-control comparison    | 189 PD compared to 137 HC*                                                                                     | Shape expansions in right putamen, bilateral globus pallidus, left thalamus, bilateral caudate | Only caudate nucleus, putamen, thalamus, globus pallidus included as regions of interest<br><br>Shape differences did not correlate with motor symptoms (UPDRS-3)            |
| Gazzina et al 2016   | Dementia                   | 16 PD with dementia compared to 11 PD without dementia                                                         | Non-significant shape contractions in bilateral hippocampus, no shape expansions               | Shape analysis was performed only in regions of interest that showed significant differences in global volume, i.e., hippocampus (PDD vs PD) and globus pallidus (DLB vs PD) |

|                    |                                                |                                                              |                                                                                                                                        |                                                                                                                                                                                                            |
|--------------------|------------------------------------------------|--------------------------------------------------------------|----------------------------------------------------------------------------------------------------------------------------------------|------------------------------------------------------------------------------------------------------------------------------------------------------------------------------------------------------------|
|                    |                                                | 16 Lewy Body dementia compared to 11 PD with dementia        | Shape differences in globus pallidus                                                                                                   |                                                                                                                                                                                                            |
| Gong et al 2020    | Excessive daytime sleepiness                   | 252 PD compared to 92 HC                                     | Shape contractions in bilateral caudate, right putamen                                                                                 |                                                                                                                                                                                                            |
|                    |                                                | 59 PD with EDS compared to 193 PD without EDS                | Shape expansions in right putamen, left globus pallidus                                                                                |                                                                                                                                                                                                            |
| Hopes et al 2016   | PD staging                                     | 70 PD (15 de novo, 40 early, 15 advanced) compared to 20 HC  | Shape contractions in caudate nucleus, putamen (for both early and advanced compared to HC/de novo and for early compared to advanced) | Only striatum included as region of interest<br><br>The different PD stages are characterized by striatal shape changes                                                                                    |
| Lee et al 2014     | Case-control comparison                        | 49 untreated early-stage PD compared to 53 HC                | Shape contractions in putamen                                                                                                          |                                                                                                                                                                                                            |
| Mak et al 2014     | Dementia                                       | 25 PD with MCI compared to 65 PD without MCI                 | No significant shape differences                                                                                                       |                                                                                                                                                                                                            |
| McKeown et al 2008 | Case-control comparison                        | 9 PD compared to 10 HC                                       | Shape differences in bilateral thalamus                                                                                                | Only thalamus included as region of interest                                                                                                                                                               |
| Menke et al 2013   | Case-control comparison, classification        | 20 early PD compared to 19 HC                                | Shape differences in right globus pallidus                                                                                             | Shape differences showed limited accuracy in the discrimination between PD and HC                                                                                                                          |
| Nemmi et al 2015   | Case-control comparison                        | 21 PD compared to 20 HC                                      | Shape differences in putamen, caudate                                                                                                  | Shape differences correlated with motor symptoms                                                                                                                                                           |
| Nyberg et al 2015  | Case-control comparison, PD subtype comparison | 21 PD compared to 20 HC                                      | Shape expansions in right nucleus accumbens                                                                                            | Shape differences were driven by a subgroup of tremor-dominant PD patients                                                                                                                                 |
| Peralta et al 2020 | Classification                                 | 368 early PD<br>180 advanced PD<br>41 prodromal PD<br>177 HC | NA                                                                                                                                     | Only putamen and caudate nucleus included as regions of interest<br><br>Putamen and caudate nucleus were found differentially informative for classification<br><br>Balanced accuracies ranged from 59-85% |

|                        |                                                |                                                                      |                                                                      |                                                                                                                                                                                                            |
|------------------------|------------------------------------------------|----------------------------------------------------------------------|----------------------------------------------------------------------|------------------------------------------------------------------------------------------------------------------------------------------------------------------------------------------------------------|
| Prashanth et al 2017   | Classification                                 | 427 early PD compared to 208 HC*                                     | Shape differences in striatum                                        | Shape features distinguished the groups with high accuracy (97%)                                                                                                                                           |
| Rahayel et al 2019     | RBD in PD comparison                           | 15 PD with RBD compared to 15 PD without RBD                         | Shape contractions in putamen                                        | More severe subcortical neurodegeneration was suggested if PD is accompanied by RBD                                                                                                                        |
|                        |                                                | 15 PD with RBD compared to 41 HC                                     | Shape contractions in basal ganglia, hippocampus                     |                                                                                                                                                                                                            |
|                        |                                                | 15 PD without RBD compared to 41 HC                                  | Shape contractions in globus pallidus, hippocampus                   |                                                                                                                                                                                                            |
| De Schipper et al 2019 | Dementia                                       | 14 Lewy Body dementia compared to 62 PD                              | Shape contractions in bilateral hippocampus                          |                                                                                                                                                                                                            |
| Sigirli et al 2021     | Case-control comparison                        | 23 early-onset PD compared to 23 HC                                  | Shape differences in right putamen                                   | Only putamen included as region of interest                                                                                                                                                                |
| Sivaranjini et al 2021 | Classification of four groups                  | 91 PD without MCI<br>25 PD with MCI<br>19 PD with dementia<br>58 HC* | Shape features differences between the four groups                   | Only nucleus accumbens, amygdala, caudate nucleus, putamen and thalamus included as regions of interest<br><br>High performance of the classifier using morphological features was observed (88.3 - 96.2%) |
| Sterling et al 2013    | Case-control comparison                        | 40 PD compared to 40 HC                                              | Shape contraction in putamen, caudate nucleus                        | Only striatum included as region of interest                                                                                                                                                               |
| Tanner et al 2017      | Case-control comparison                        | 72 PD compared to 48 HC                                              | Shape differences in bilateral putamen, caudate nucleus, hippocampus |                                                                                                                                                                                                            |
| Vervoort et al 2016    | Case-control comparison, PD subtype comparison | 55 PD (39 PIGD, 16 TD) compared to 19 HC                             | Shape contraction in left caudate (PD-PIGD vs HC)                    | Only putamen, caudate, globus pallidus included as regions of interest                                                                                                                                     |

\*data obtained from the publicly available Parkinson's Progression Markers Initiative (PPMI)

\*\*as observed on DA transporter single-photon emission tomography

Abbreviations: DAT-SPECT, DA transporter single-photon emission tomography; DLB, Lewy Body Dementia; EDS, excessive daytime sleepiness; HC, healthy controls; MCI, mild cognitive impairment; PD, Parkinson's Disease; PDD, Parkinson's Disease Dementia; PIGD, postural instability and gait disorder; TD, tremor dominant; UPDRS-3, Unified Parkinson's Disease Rating Scale, part 3.

**Table S2. Demographics complete sample per cohort**

| Site            | Cohort              | N         |     |     | N Females |     | Age $\pm$ SD      |                   | Time since diagnosis $\pm$ SD |                  | MoCA $\pm$ SD    |                  | MDS-UPDRS3 OFF $\pm$ SD |                   |
|-----------------|---------------------|-----------|-----|-----|-----------|-----|-------------------|-------------------|-------------------------------|------------------|------------------|------------------|-------------------------|-------------------|
|                 |                     | All (%)   | HC  | PD  | HC        | PD  | HC                | PD                | HC                            | PD               | HC               | PD               | HC                      | PD                |
| Amsterdam       | Amsterdam I         | 120 (3.1) | 0   | 120 | NA        | 48  | NA                | 63.71 $\pm$ 10.85 | NA                            | 2.13 $\pm$ 3.39  | NA               | NA               | NA                      | NA                |
|                 | Amsterdam II        | 113 (2.9) | 30  | 83  | 12        | 33  | 62.53 $\pm$ 9.70  | 63.25 $\pm$ 7.19  | NA                            | 5.40 $\pm$ 3.86  | 28.23 $\pm$ 1.48 | 26.20 $\pm$ 2.17 | NA                      | 23.20 $\pm$ 11.09 |
|                 | Amsterdam III       | 62 (1.6)  | 44  | 18  | 17        | 4   | 56.55 $\pm$ 9.48  | 59.22 $\pm$ 9.97  | NA                            | NA               | NA               | NA               | NA                      | 37.58 $\pm$ 10.18 |
| Bern            | BE I                | 73 (1.9)  | 21  | 52  | 6         | 27  | 54.29 $\pm$ 9.83  | 62.94 $\pm$ 10.38 | NA                            | 12.42 $\pm$ 4.29 | NA               | 23.00 $\pm$ 5.66 | NA                      | 40.03 $\pm$ 13.30 |
|                 | BE II               | 33 (0.9)  | 30  | 3   | 21        | 2   | 68.17 $\pm$ 4.59  | 59.67 $\pm$ 6.66  | NA                            | 11.33 $\pm$ 7.57 | NA               | NA               | NA                      | 35.00 $\pm$ 8.19  |
| Cape Town       | Cape Town           | 17 (0.4)  | 7   | 10  | 3         | 2   | 66.57 $\pm$ 5.68  | 66.30 $\pm$ 5.91  | NA                            | 7.12 $\pm$ 3.68  | 26.29 $\pm$ 1.89 | 25.60 $\pm$ 3.50 | NA                      | NA                |
| Chang Gung      | CGU                 | 550 (14)  | 223 | 327 | 120       | 139 | 60.95 $\pm$ 7.28  | 60.09 $\pm$ 9.63  | NA                            | 8.70 $\pm$ 6.33  | NA               | NA               | NA                      | 28.19 $\pm$ 16.93 |
| Charlottesville | Charlottesville I   | 117 (3.0) | 0   | 117 | NA        | 33  | NA                | 63.62 $\pm$ 8.49  | NA                            | 9.70 $\pm$ 5.07  | NA               | 24.86 $\pm$ 3.44 | NA                      | 37.01 $\pm$ 10.30 |
|                 | Charlottesville II  | 38 (1.0)  | 0   | 38  | NA        | 5   | NA                | 62.29 $\pm$ 9.51  | NA                            | 8.82 $\pm$ 3.66  | NA               | 24.28 $\pm$ 3.45 | NA                      | 37.42 $\pm$ 11.15 |
|                 | Charlottesville III | 24 (0.6)  | 0   | 24  | NA        | 7   | NA                | 70.84 $\pm$ 6.77  | NA                            | 7.73 $\pm$ 3.23  | NA               | 23.39 $\pm$ 4.60 | NA                      | 37.90 $\pm$ 13.30 |
| Christchurch    | Christchurch        | 263 (6.8) | 53  | 210 | 18        | 56  | 69.13 $\pm$ 8.14  | 69.45 $\pm$ 7.77  | NA                            | 5.77 $\pm$ 5.59  | 27.06 $\pm$ 2.13 | 23.58 $\pm$ 4.18 | NA                      | 31.15 $\pm$ 17.35 |
| Donders         | Donders             | 82 (2.1)  | 23  | 59  | 11        | 26  | 62.65 $\pm$ 10.29 | 60.81 $\pm$ 10.07 | NA                            | 4.42 $\pm$ 3.79  | NA               | NA               | NA                      | 32.98 $\pm$ 15.63 |
| Liege           | Liege I             | 63 (1.6)  | 33  | 30  | 15        | 11  | 65.85 $\pm$ 4.29  | 65.87 $\pm$ 6.61  | NA                            | 7.23 $\pm$ 5.32  | NA               | NA               | NA                      | 17.67 $\pm$ 9.87  |
|                 | Liege II            | 88 (2.3)  | 43  | 45  | 21        | 20  | 64.80 $\pm$ 8.33  | 66.89 $\pm$ 8.24  | NA                            | 5.96 $\pm$ 3.93  | NA               | NA               | NA                      | NA                |
| Milan           | Milan               | 73 (1.9)  | 25  | 48  | 15        | 15  | 53.48 $\pm$ 8.80  | 57.54 $\pm$ 7.53  | NA                            | 11.09 $\pm$ 3.55 | NA               | NA               | NA                      | 27.40 $\pm$ 11.23 |
| Neurocon        | Neurocon            | 42 (1.1)  | 15  | 27  | 12        | 10  | 66.73 $\pm$ 11.74 | 68.70 $\pm$ 10.55 | NA                            | NA               | NA               | NA               | NA                      | 28.33 $\pm$ 9.27  |
| NW-England      | NW-England I        | 27 (0.7)  | 13  | 14  | 5         | 4   | 64.62 $\pm$ 4.13  | 65.00 $\pm$ 5.67  | NA                            | 9.21 $\pm$ 6.02  | 29.00 $\pm$ 1.41 | 26.25 $\pm$ 2.93 | NA                      | NA                |
|                 | NW-England II       | 62 (1.6)  | 30  | 32  | 14        | 6   | 70.60 $\pm$ 7.65  | 69.94 $\pm$ 8.58  | NA                            | 6.83 $\pm$ 4.42  | 27.03 $\pm$ 2.22 | 24.84 $\pm$ 4.25 | NA                      | NA                |
| ON Japan        | ON Japan            | 45 (1.2)  | 15  | 30  | 8         | 17  | 63.33 $\pm$ 5.25  | 67.57 $\pm$ 6.81  | NA                            | NA               | NA               | NA               | NA                      | NA                |
| Oxford          | Oxford DISCOVERY    | 181 (4.7) | 66  | 115 | 23        | 41  | 65.95 $\pm$ 8.67  | 63.96 $\pm$ 10.17 | NA                            | 2.29 $\pm$ 1.58  | 27.36 $\pm$ 2.04 | 26.39 $\pm$ 2.79 | NA                      | 28.56 $\pm$ 13.69 |
| Pennsylvania    | Pennsylvania        | 122 (3.2) | 11  | 111 | 6         | 35  | 70.09 $\pm$ 5.86  | 66.45 $\pm$ 7.87  | NA                            | 7.35 $\pm$ 5.48  | NA               | 25.50 $\pm$ 3.30 | NA                      | NA                |
| PPMI            | PPMI                | 504 (13)  | 159 | 345 | 58        | 120 | 60.40 $\pm$ 11.45 | 61.67 $\pm$ 9.67  | NA                            | 0.58 $\pm$ 0.56  | 28.26 $\pm$ 1.11 | 27.15 $\pm$ 2.26 | NA                      | 20.29 $\pm$ 8.59  |
| Graz            | PROMOVE ASPS I      | 227 (5.9) | 125 | 102 | 34        | 29  | 63.58 $\pm$ 10.17 | 63.48 $\pm$ 10.25 | NA                            | 4.73 $\pm$ 4.83  | NA               | NA               | NA                      | 29.04 $\pm$ 19.99 |
|                 | PROMOVE ASPS II     | 23 (0.6)  | 0   | 23  | NA        | 5   | NA                | 64.00 $\pm$ 9.90  | NA                            | 4.04 $\pm$ 5.69  | NA               | NA               | NA                      | 24.67 $\pm$ 13.20 |
| Rome SLF        | Rome SLF            | 367 (9.5) | 127 | 240 | 51        | 88  | 36.61 $\pm$ 10.56 | 62.90 $\pm$ 10.15 | NA                            | 4.96 $\pm$ 4.15  | NA               | NA               | NA                      | 16.67 $\pm$ 10.67 |

|              |             |              |              |              |                      |                      |                      |                     |           |                    |                     |                     |           |                      |
|--------------|-------------|--------------|--------------|--------------|----------------------|----------------------|----------------------|---------------------|-----------|--------------------|---------------------|---------------------|-----------|----------------------|
| Stanford     | Stanford I  | 173 (4.5)    | 44           | 129          | 27                   | 52                   | 68.09 ± 6.28         | 69.24 ± 8.28        | NA        | 5.48 ± 4.14        | 26.95 ± 2.03        | 25.33 ± 4.39        | NA        | 36.44 ± 12.12        |
|              | Stanford II | 40 (1.0)     | 19           | 21           | 12                   | 9                    | 59.61 ± 9.86         | 61.39 ± 8.16        | NA        | 3.73 ± 2.65        | NA                  | 27.19 ± 3.06        | NA        | 25.52 ± 7.78         |
| Tao Wu       | Tao Wu      | 39 (1.0)     | 20           | 19           | 8                    | 9                    | 64.75 ± 5.58         | 65.00 ± 4.45        | NA        | 5.32 ± 4.00        | NA                  | NA                  | NA        | NA                   |
| Udal         | Udal        | 43 (1.1)     | 18           | 25           | 11                   | 7                    | 62.55 ± 9.97         | 66.15 ± 10.00       | NA        | 8.93 ± 4.86        | 27.83 ± 1.47        | 26.40 ± 2.12        | NA        | NA                   |
| Campinas     | UNICAMP     | 240 (6.2)    | 132          | 108          | 81                   | 36                   | 58.88 ± 7.77         | 59.84 ± 10.27       | NA        | 7.33 ± 6.44        | NA                  | NA                  | NA        | NA                   |
| <b>Total</b> |             | <b>3.851</b> | <b>1.326</b> | <b>2.525</b> | <b>609<br/>(46%)</b> | <b>896<br/>(35%)</b> | <b>60.00 ± 12.20</b> | <b>63.69 ± 9.75</b> | <b>NA</b> | <b>5.59 ± 5.43</b> | <b>27.72 ± 1.78</b> | <b>25.69 ± 3.52</b> | <b>NA</b> | <b>28.25 ± 14.39</b> |

Abbreviations: N, sample size; sd, standard deviation; MoCA, Montreal Cognitive Assessment; MDS-UPDRS3, Movement Disorders Society sponsored revision of the Unified Parkinson's disease rating scale part 3; HC, healthy controls; PD, Parkinson's disease.

**Table S3. Comparison complete sample PD vs controls**

| ROI            | n vertices   | n (%) significant  | n (%) thicker     | n (%) thinner      | thicker max beta | thinner max beta |
|----------------|--------------|--------------------|-------------------|--------------------|------------------|------------------|
| L thalamus     | 2502         | 1129 (45.1)        | 1101 (44)         | 28 (1.1)           | 0.17             | -0.09            |
| L caudate      | 2502         | 1074 (42.9)        | 97 (3.9)          | 977 (39)           | 0.11             | -0.09            |
| L putamen      | 2502         | 1165 (46.6)        | 106 (4.2)         | 1059 (42.3)        | 0.14             | -0.17            |
| L pallidum     | 1254         | 223 (17.8)         | 95 (7.6)          | 128 (10.2)         | 0.13             | -0.11            |
| L hippocampus  | 2502         | 42 (1.7)           | 6 (0.2)           | 36 (1.4)           | 0.07             | -0.09            |
| L amygdala     | 1368         | 361 (26.4)         | 0 (0)             | 361 (26.4)         | 0                | -0.08            |
| L accumbens    | 930          | 42 (4.5)           | 2 (0.2)           | 40 (4.3)           | 0.13             | -0.08            |
| R thalamus     | 2502         | 813 (32.5)         | 811 (32.4)        | 2 (0.1)            | 0.13             | -0.02            |
| R caudate      | 2502         | 592 (23.7)         | 112 (4.5)         | 480 (19.2)         | 0.14             | -0.08            |
| R putamen      | 2502         | 1239 (49.5)        | 8 (0.3)           | 1231 (49.2)        | 0.1              | -0.18            |
| R pallidum     | 1254         | 216 (17.2)         | 65 (5.2)          | 151 (12)           | 0.13             | -0.09            |
| R hippocampus  | 2502         | 4 (0.2)            | 4 (0.2)           | 0 (0)              | 0.04             | 0                |
| R amygdala     | 1368         | 279 (20.4)         | 9 (0.7)           | 270 (19.7)         | 0.13             | -0.11            |
| R accumbens    | 930          | 58 (6.2)           | 0 (0)             | 58 (6.2)           | 0                | -0.08            |
| <b>Overall</b> | <b>27120</b> | <b>7237 (23.9)</b> | <b>2416 (7.4)</b> | <b>4821 (16.5)</b> | <b>0.17</b>      | <b>-0.18</b>     |

Corrected for age, sex and intracranial volume as fixed factors, and cohort as random intercept.

**Table S4. Sample size by ROI and number of excluded failed segmentations**

| ROI           | Analysis N (%) |                   | Segmentation failed N (%) |          |
|---------------|----------------|-------------------|---------------------------|----------|
|               | PD (N=2525)    | Controls (N=1326) | PD                        | Controls |
| L thalamus    | 2429 (96.2)    | 1288 (97.1)       | 96 (3.8)                  | 38 (2.9) |
| R thalamus    | 2355 (93.3)    | 1257 (94.8)       | 170 (6.7)                 | 69 (5.2) |
| L caudate     | 2458 (97.3)    | 1302 (98.2)       | 67 (2.7)                  | 24 (1.8) |
| R caudate     | 2420 (95.8)    | 1279 (96.5)       | 105 (4.2)                 | 47 (3.5) |
| L putamen     | 2442 (96.7)    | 1293 (97.5)       | 83 (3.3)                  | 33 (2.5) |
| R putamen     | 2443 (96.8)    | 1296 (97.7)       | 82 (3.2)                  | 30 (2.3) |
| L pallidum    | 2348 (93)      | 1256 (94.7)       | 177 (7)                   | 70 (5.3) |
| R pallidum    | 2364 (93.6)    | 1277 (96.3)       | 161 (6.4)                 | 49 (3.7) |
| L hippocampus | 2354 (93.2)    | 1260 (95)         | 171 (6.8)                 | 66 (5)   |
| R hippocampus | 2416 (95.7)    | 1287 (97.1)       | 109 (4.3)                 | 39 (2.9) |
| L amygdala    | 2455 (97.2)    | 1289 (97.2)       | 70 (2.8)                  | 37 (2.8) |
| R amygdala    | 2451 (97.1)    | 1301 (98.1)       | 74 (2.9)                  | 25 (1.9) |
| L accumbens   | 2399 (95)      | 1268 (95.6)       | 126 (5)                   | 58 (4.4) |
| R accumbens   | 2370 (93.9)    | 1275 (96.2)       | 155 (6.1)                 | 51 (3.8) |

Abbreviations: ROI; Region Of Interest, PD; Parkinson's Disease, L; Left, R; Right.

**Table S5. Hoehn & Yahr Stage Characteristics**

| Characteristic      | N     | HY1, N = 451 | HY2, N = 1,203 | HY3, N = 283  | HY4-5, N = 86 |
|---------------------|-------|--------------|----------------|---------------|---------------|
| <b>Age</b>          | 2.023 | 59.54 ± 9.86 | 64.55 ± 9.06   | 65.80 ± 10.20 | 67.38 ± 9.78  |
| <b>n (%) Female</b> | 2.023 | 177 (39%)    | 401 (33%)      | 117 (41%)     | 37 (43%)      |

|                             |       |                |                 |                 |                 |
|-----------------------------|-------|----------------|-----------------|-----------------|-----------------|
| <b>Time since diagnosis</b> | 1.953 | 2.31 ± 2.54 *  | 4.99 ± 4.86 *   | 8.86 ± 6.22 *   | 13.99 ± 5.64 *  |
| <i>n</i> missing            |       | 5              | 60              | 3               | 2               |
| <b>MoCA</b>                 | 1.069 | 27.19 ± 2.32 * | 26.02 ± 3.14 *  | 24.36 ± 3.85 *  | 19.79 ± 5.21 *  |
| <i>n</i> missing            |       | 211            | 558             | 132             | 53              |
| <b>MDS-UPDRS3 OFF</b>       | 1.028 | 15.29 ± 6.86 * | 28.70 ± 11.08 * | 39.61 ± 14.77 * | 55.08 ± 12.73 * |
| <i>n</i> missing            |       | 150            | 634             | 173             | 38              |

*n* (%); Mean ± SD; \* Significantly different from other Hoehn & Yahr stage groups on Mann-Whitney test at  $p < 0.001$

**Table S6. MatchIT controls selection and overlap between Hoehn and Yahr stage analyses**

| <b>Overlap controls</b> | <b>HY1 (n = 887)</b> | <b>HY2 (n = 1068)</b> | <b>HY3 (n = 846)</b> | <b>HY4-5 (n = 680)</b> |
|-------------------------|----------------------|-----------------------|----------------------|------------------------|
| HY1                     | NA                   | 773                   | 593                  | 456                    |
| HY2                     | 773                  | NA                    | 792                  | 617                    |
| HY3                     | 593                  | 792                   | NA                   | 580                    |
| HY4-5                   | 456                  | 617                   | 580                  | NA                     |

Abbreviations: HY; Hoehn and Yahr.



**Table S7A-D. Results HY-control comparison**

Corrected for age, sex and intracranial volume as fixed factors, and cohort as random intercept.

**A - HY1 vs controls**

| ROI            | n vertices   | n (%) significant | n (%) thicker    | n (%) thinner    | thicker max beta | thinner max beta |
|----------------|--------------|-------------------|------------------|------------------|------------------|------------------|
| L thalamus     | 2502         | 222 (8.9)         | 222 (8.9)        | 0 (0)            | 0.19             | 0                |
| R thalamus     | 2502         | 96 (3.8)          | 96 (3.8)         | 0 (0)            | 0.15             | 0                |
| L caudate      | 2502         | 1 (0)             | 1 (0)            | 0 (0)            | 0.12             | 0                |
| R caudate      | 2502         | 47 (1.9)          | 47 (1.9)         | 0 (0)            | 0.2              | 0                |
| L putamen      | 2502         | 120 (4.8)         | 0 (0)            | 120 (4.8)        | 0                | -0.2             |
| R putamen      | 2502         | 205 (8.2)         | 0 (0)            | 205 (8.2)        | 0                | -0.18            |
| L pallidum     | 1254         | 9 (0.7)           | 9 (0.7)          | 0 (0)            | 0.14             | 0                |
| R pallidum     | 1254         | 50 (4)            | 0 (0)            | 50 (4)           | 0                | -0.12            |
| L hippocampus  | 2502         | 0 (0)             | 0 (0)            | 0 (0)            | 0                | 0                |
| R hippocampus  | 2502         | 0 (0)             | 0 (0)            | 0 (0)            | 0                | 0                |
| L amygdala     | 1368         | 0 (0)             | 0 (0)            | 0 (0)            | 0                | 0                |
| R amygdala     | 1368         | 0 (0)             | 0 (0)            | 0 (0)            | 0                | 0                |
| L accumbens    | 930          | 0 (0)             | 0 (0)            | 0 (0)            | 0                | 0                |
| R accumbens    | 930          | 7 (0.8)           | 0 (0)            | 7 (0.8)          | 0                | -0.1             |
| <b>Overall</b> | <b>27120</b> | <b>757 (2.4)</b>  | <b>375 (1.1)</b> | <b>382 (1.3)</b> | <b>0.2</b>       | <b>-0.2</b>      |

**B - HY2 vs controls**

| ROI            | n vertices   | n (%) significant | n (%) thicker     | n (%) thinner     | thicker max beta | thinner max beta |
|----------------|--------------|-------------------|-------------------|-------------------|------------------|------------------|
| L thalamus     | 2502         | 291 (11.6)        | 262 (10.5)        | 29 (1.2)          | 0.15             | -0.13            |
| R thalamus     | 2502         | 488 (19.5)        | 488 (19.5)        | 0 (0)             | 0.13             | 0                |
| L caudate      | 2502         | 301 (12)          | 20 (0.8)          | 281 (11.2)        | 0.08             | -0.09            |
| R caudate      | 2502         | 221 (8.8)         | 25 (1)            | 196 (7.8)         | 0.12             | -0.09            |
| L putamen      | 2502         | 440 (17.6)        | 28 (1.1)          | 412 (16.5)        | 0.15             | -0.14            |
| R putamen      | 2502         | 620 (24.8)        | 74 (3)            | 546 (21.8)        | 0.16             | -0.17            |
| L pallidum     | 1254         | 57 (4.5)          | 44 (3.5)          | 13 (1)            | 0.11             | -0.08            |
| R pallidum     | 1254         | 93 (7.4)          | 93 (7.4)          | 0 (0)             | 0.1              | 0                |
| L hippocampus  | 2502         | 2 (0.1)           | 2 (0.1)           | 0 (0)             | 0.04             | 0                |
| R hippocampus  | 2502         | 23 (0.9)          | 3 (0.1)           | 20 (0.8)          | 0.07             | -0.11            |
| L amygdala     | 1368         | 88 (6.4)          | 0 (0)             | 88 (6.4)          | 0                | -0.08            |
| R amygdala     | 1368         | 39 (2.9)          | 0 (0)             | 39 (2.9)          | 0                | -0.07            |
| L accumbens    | 930          | 20 (2.2)          | 0 (0)             | 20 (2.2)          | 0                | -0.08            |
| R accumbens    | 930          | 7 (0.8)           | 0 (0)             | 7 (0.8)           | 0                | -0.08            |
| <b>Overall</b> | <b>27120</b> | <b>2690 (8.5)</b> | <b>1039 (3.4)</b> | <b>1651 (5.2)</b> | <b>0.16</b>      | <b>-0.17</b>     |

**C - HY3 vs controls**

| ROI        | n vertices | n (%) significant | n (%) thicker | n (%) thinner | thicker max beta | thinner max beta |
|------------|------------|-------------------|---------------|---------------|------------------|------------------|
| L thalamus | 2502       | 57 (2.3)          | 53 (2.1)      | 4 (0.2)       | 0.19             | -0.09            |
| R thalamus | 2502       | 189 (7.6)         | 9 (0.4)       | 180 (7.2)     | 0.17             | -0.2             |

|                |              |                    |                  |                    |             |              |
|----------------|--------------|--------------------|------------------|--------------------|-------------|--------------|
| L caudate      | 2502         | 590 (23.6)         | 9 (0.4)          | 581 (23.2)         | 0.16        | -0.21        |
| R caudate      | 2502         | 567 (22.7)         | 10 (0.4)         | 557 (22.3)         | 0.18        | -0.22        |
| L putamen      | 2502         | 1472 (58.8)        | 0 (0)            | 1472 (58.8)        | 0           | -0.3         |
| R putamen      | 2502         | 1359 (54.3)        | 0 (0)            | 1359 (54.3)        | 0           | -0.35        |
| L pallidum     | 1254         | 0 (0)              | 0 (0)            | 0 (0)              | 0           | 0            |
| R pallidum     | 1254         | 24 (1.9)           | 0 (0)            | 24 (1.9)           | 0           | -0.28        |
| L hippocampus  | 2502         | 402 (16.1)         | 16 (0.6)         | 386 (15.4)         | 0.14        | -0.25        |
| R hippocampus  | 2502         | 77 (3.1)           | 0 (0)            | 77 (3.1)           | 0           | -0.23        |
| L amygdala     | 1368         | 1090 (79.7)        | 0 (0)            | 1090 (79.7)        | 0           | -0.33        |
| R amygdala     | 1368         | 958 (70)           | 0 (0)            | 958 (70)           | 0           | -0.31        |
| L accumbens    | 930          | 306 (32.9)         | 0 (0)            | 306 (32.9)         | 0           | -0.28        |
| R accumbens    | 930          | 206 (22.2)         | 3 (0.3)          | 203 (21.8)         | 0.17        | -0.28        |
| <b>Overall</b> | <b>27120</b> | <b>7297 (28.2)</b> | <b>100 (0.3)</b> | <b>7197 (27.9)</b> | <b>0.19</b> | <b>-0.35</b> |

#### D - HY4-5 vs controls

| ROI            | n vertices   | n (%) significant   | n (%) thicker    | n (%) thinner       | thicker max beta | thinner max beta |
|----------------|--------------|---------------------|------------------|---------------------|------------------|------------------|
| L thalamus     | 2502         | 739 (29.5)          | 15 (0.6)         | 724 (28.9)          | 0.2              | -0.4             |
| R thalamus     | 2502         | 507 (20.3)          | 6 (0.2)          | 501 (20)            | 0.12             | -0.42            |
| L caudate      | 2502         | 1185 (47.4)         | 16 (0.6)         | 1169 (46.7)         | 0.31             | -0.5             |
| R caudate      | 2502         | 448 (17.9)          | 46 (1.8)         | 402 (16.1)          | 0.35             | -0.47            |
| L putamen      | 2502         | 1186 (47.4)         | 3 (0.1)          | 1183 (47.3)         | 0.07             | -0.52            |
| R putamen      | 2502         | 1380 (55.2)         | 8 (0.3)          | 1372 (54.8)         | 0.12             | -0.57            |
| L pallidum     | 1254         | 47 (3.7)            | 0 (0)            | 47 (3.7)            | 0                | -0.53            |
| R pallidum     | 1254         | 750 (59.8)          | 1 (0.1)          | 749 (59.7)          | 0.2              | -0.53            |
| L hippocampus  | 2502         | 1250 (50)           | 13 (0.5)         | 1237 (49.4)         | 0.19             | -0.62            |
| R hippocampus  | 2502         | 1216 (48.6)         | 51 (2)           | 1165 (46.6)         | 0.22             | -0.67            |
| L amygdala     | 1368         | 925 (67.6)          | 0 (0)            | 925 (67.6)          | 0                | -0.59            |
| R amygdala     | 1368         | 872 (63.7)          | 0 (0)            | 872 (63.7)          | 0                | -0.49            |
| L accumbens    | 930          | 320 (34.4)          | 1 (0.1)          | 319 (34.3)          | 0.2              | -0.53            |
| R accumbens    | 930          | 772 (83)            | 0 (0)            | 772 (83)            | 0                | -0.62            |
| <b>Overall</b> | <b>27120</b> | <b>11597 (44.9)</b> | <b>160 (0.5)</b> | <b>11437 (44.4)</b> | <b>0.35</b>      | <b>-0.67</b>     |

**Table S8. Sample characteristics subgroup analysis**

|                             | Time since diagnosis | MoCA          | MDS-UPDRS3 OFF |
|-----------------------------|----------------------|---------------|----------------|
| <b>N</b>                    | 2,350                | 1,216         | 1,153          |
| <b>n missing</b>            | 175                  | 1,309         | 1,372          |
| <b>Age</b>                  | 63.67 ± 9.67         | 65.14 ± 9.24  | 62.39 ± 9.71   |
| <b>n (%) Female</b>         | 829 (35%)            | 394 (32%)     | 437 (38%)      |
| <b>Time since diagnosis</b> | 5.59 ± 5.43          | 4.57 ± 5.02   | 5.14 ± 5.76    |
| <b>MoCA</b>                 | 25.65 ± 3.53         | 25.69 ± 3.52  | 26.28 ± 3.17   |
| <b>MDS-UPDRS3 OFF</b>       | 28.01 ± 14.51        | 27.05 ± 13.08 | 28.25 ± 14.39  |

Abbreviations: MoCA, Montreal Cognitive Assessment; MDS-UPDRS3 OFF, Movement Disorders Society sponsored revision of the Unified Parkinson's disease rating scale part 3 assessed in OFF medication state.

**Table S9. Pearson's correlation tests between clinical variables of interest**

|                    | MoCA ~ MDS-UPDRS3 | MoCA ~ time since diagnosis | MDS-UPDRS3 ~ time since diagnosis |
|--------------------|-------------------|-----------------------------|-----------------------------------|
| <b>n</b>           | 672               | 1187                        | 1088                              |
| <b>t value</b>     | -9.02             | -9.88                       | 15.79                             |
| <b>df</b>          | 670               | 1185                        | 1086                              |
| <b>p value</b>     | < .001            | < .001                      | < .001                            |
| <b>Pearson's r</b> | -.33              | -.28                        | .43                               |
| <b>conf. int.</b>  | -.39 - -.26       | -.33 - -.22                 | .38 - .48                         |

Pearson's product-moment correlations were tested for subjects with both clinical variables for the test of interest available (MoCA, MDS-UPDRS-III, or time since diagnosis). Abbreviations: MoCA, Montreal Cognitive Assessment; MDS-UPDRS3 OFF, Movement Disorders Society sponsored revision of the Unified Parkinson's disease rating scale part 3 assessed in OFF medication state.

**Table S10. Results time since diagnosis analysis**

| ROI           | n vertices | n (%) significant | n (%) positive | n (%) negative | positive beta max | negative beta max |
|---------------|------------|-------------------|----------------|----------------|-------------------|-------------------|
| L thalamus    | 2502       | 513 (20.5)        | 0 (0)          | 513 (20.5)     | 0                 | -0.01             |
| R thalamus    | 2502       | 598 (23.9)        | 0 (0)          | 598 (23.9)     | 0                 | -0.01             |
| L caudate     | 2502       | 1096 (43.8)       | 0 (0)          | 1096 (43.8)    | 0                 | -0.02             |
| R caudate     | 2502       | 883 (35.3)        | 0 (0)          | 883 (35.3)     | 0                 | -0.02             |
| L putamen     | 2502       | 872 (34.9)        | 0 (0)          | 872 (34.9)     | 0                 | -0.02             |
| R putamen     | 2502       | 371 (14.8)        | 13 (0.5)       | 358 (14.3)     | 0                 | -0.02             |
| L pallidum    | 1254       | 0 (0)             | 0 (0)          | 0 (0)          | 0                 | 0                 |
| R pallidum    | 1254       | 0 (0)             | 0 (0)          | 0 (0)          | 0                 | 0                 |
| L hippocampus | 2502       | 3 (0.1)           | 3 (0.1)        | 0 (0)          | 0.01              | 0                 |
| R hippocampus | 2502       | 322 (12.9)        | 0 (0)          | 322 (12.9)     | 0                 | -0.01             |
| L amygdala    | 1368       | 782 (57.2)        | 0 (0)          | 782 (57.2)     | 0                 | -0.02             |
| R amygdala    | 1368       | 807 (59)          | 0 (0)          | 807 (59)       | 0                 | -0.02             |

|                |              |                    |               |                    |             |              |
|----------------|--------------|--------------------|---------------|--------------------|-------------|--------------|
| L accumbens    | 930          | 638 (68.6)         | 0 (0)         | 638 (68.6)         | 0           | -0.02        |
| R accumbens    | 930          | 566 (60.9)         | 0 (0)         | 566 (60.9)         | 0           | -0.02        |
| <b>Overall</b> | <b>27120</b> | <b>7451 (30.8)</b> | <b>16 (0)</b> | <b>7435 (30.8)</b> | <b>0.01</b> | <b>-0.02</b> |

Corrected for age, sex and intracranial volume as fixed factors, and cohort as random intercept.

**Table S11. Results MoCA analysis**

| ROI            | n vertices   | n (%) significant  | n (%) positive     | n (%) negative    | positive beta max | negative beta max |
|----------------|--------------|--------------------|--------------------|-------------------|-------------------|-------------------|
| L thalamus     | 2502         | 163 (6.5)          | 143 (5.7)          | 20 (0.8)          | 0.02              | -0.02             |
| R thalamus     | 2502         | 140 (5.6)          | 94 (3.8)           | 46 (1.8)          | 0.02              | -0.02             |
| L caudate      | 2502         | 957 (38.2)         | 436 (17.4)         | 521 (20.8)        | 0.03              | -0.05             |
| R caudate      | 2502         | 662 (26.5)         | 150 (6)            | 512 (20.5)        | 0.02              | -0.03             |
| L putamen      | 2502         | 718 (28.7)         | 715 (28.6)         | 3 (0.1)           | 0.03              | -0.03             |
| R putamen      | 2502         | 552 (22.1)         | 533 (21.3)         | 19 (0.8)          | 0.03              | -0.02             |
| L pallidum     | 1254         | 0 (0)              | 0 (0)              | 0 (0)             | 0                 | 0                 |
| R pallidum     | 1254         | 55 (4.4)           | 0 (0)              | 55 (4.4)          | 0                 | -0.02             |
| L hippocampus  | 2502         | 200 (8)            | 200 (8)            | 0 (0)             | 0.03              | 0                 |
| R hippocampus  | 2502         | 185 (7.4)          | 185 (7.4)          | 0 (0)             | 0.03              | 0                 |
| L amygdala     | 1368         | 242 (17.7)         | 242 (17.7)         | 0 (0)             | 0.02              | 0                 |
| R amygdala     | 1368         | 317 (23.2)         | 317 (23.2)         | 0 (0)             | 0.03              | 0                 |
| L accumbens    | 930          | 95 (10.2)          | 95 (10.2)          | 0 (0)             | 0.02              | 0                 |
| R accumbens    | 930          | 165 (17.7)         | 163 (17.5)         | 2 (0.2)           | 0.03              | -0.02             |
| <b>Overall</b> | <b>27120</b> | <b>4451 (15.4)</b> | <b>3273 (11.9)</b> | <b>1178 (3.5)</b> | <b>0.03</b>       | <b>-0.05</b>      |

Corrected for age, sex and intracranial volume as fixed factors, and cohort as random intercept. Abbreviations: MoCA, Montreal Cognitive Assessment.

**Table S12. Results MDS-UPDRS3 OFF analysis**

| ROI            | n vertices   | n (%) significant  | n (%) positive  | n (%) negative     | positive beta max | negative beta max |
|----------------|--------------|--------------------|-----------------|--------------------|-------------------|-------------------|
| L thalamus     | 2502         | 338 (13.5)         | 0 (0)           | 338 (13.5)         | 0                 | -0.01             |
| R thalamus     | 2502         | 617 (24.7)         | 0 (0)           | 617 (24.7)         | 0                 | -0.01             |
| L caudate      | 2502         | 818 (32.7)         | 601 (24)        | 217 (8.7)          | 0.01              | -0.01             |
| R caudate      | 2502         | 363 (14.5)         | 201 (8)         | 162 (6.5)          | 0.01              | -0.01             |
| L putamen      | 2502         | 260 (10.4)         | 20 (0.8)        | 240 (9.6)          | 0.01              | -0.01             |
| R putamen      | 2502         | 432 (17.3)         | 104 (4.2)       | 328 (13.1)         | 0.01              | -0.01             |
| L pallidum     | 1254         | 163 (13)           | 163 (13)        | 0 (0)              | 0.01              | 0                 |
| R pallidum     | 1254         | 44 (3.5)           | 44 (3.5)        | 0 (0)              | 0                 | 0                 |
| L hippocampus  | 2502         | 276 (11)           | 17 (0.7)        | 259 (10.4)         | 0                 | -0.01             |
| R hippocampus  | 2502         | 438 (17.5)         | 61 (2.4)        | 377 (15.1)         | 0                 | -0.01             |
| L amygdala     | 1368         | 522 (38.2)         | 0 (0)           | 522 (38.2)         | 0                 | -0.01             |
| R amygdala     | 1368         | 57 (4.2)           | 0 (0)           | 57 (4.2)           | 0                 | -0.01             |
| L accumbens    | 930          | 640 (68.8)         | 0 (0)           | 640 (68.8)         | 0                 | -0.01             |
| R accumbens    | 930          | 79 (8.5)           | 0 (0)           | 79 (8.5)           | 0                 | -0.01             |
| <b>Overall</b> | <b>27120</b> | <b>5047 (19.8)</b> | <b>1211 (4)</b> | <b>3836 (15.8)</b> | <b>0.01</b>       | <b>-0.01</b>      |

Corrected for age, sex and intracranial volume as fixed factors, and cohort as random intercept. Abbreviations: MDS-UPDRS3 OFF, Movement Disorders Society sponsored revision of the Unified Parkinson's disease rating scale part 3 assessed in OFF medication state.

**Table SI3. Machine learning model comparison**

|           |       | One-against-All | Ordit |
|-----------|-------|-----------------|-------|
| F-score   | HY1   | 0.51            | 0.39  |
|           | HY2   | 0.44            | 0.58  |
|           | HY345 | 0.42            | 0.36  |
| Recall    | HY1   | 0.64            | 0.47  |
|           | HY2   | 0.33            | 0.55  |
|           | HY345 | 0.59            | 0.33  |
| Precision | HY1   | 0.42            | 0.33  |
|           | HY2   | 0.66            | 0.62  |
|           | HY345 | 0.33            | 0.39  |

Performance metrics for the One-against-All binary classification and Ordit ordinal classification models across Hoehn and Yahr stages. Abbreviations: HY, Hoehn and Yahr.

**Table SI4A-D. Results k-means clustering on thalamus vertices of HY1 + HY2 participants**

Cluster differences were characterized by total volume of the thalamus and other subcortical structures, but not by age, sex, ICV, HY stage, time since diagnosis, age of onset, MDS-UPDRS3, MoCA and/or LEDD.

Abbreviations: HY, Hoehn & Yahr; AO, Age of onset; MoCA, Montreal Cognitive Assessment; MDS-UPDRS3, Movement Disorders Society sponsored revision of the Unified Parkinson's disease rating scale part 3; LEDD, Levodopa equivalent daily dose; ICV, intracranial volume; L, left; R, right.

**A - K=2 Sample descriptives**

| Variable           | Cluster 0 | Cluster 1 | Chi-Squared Test (p-value) |  |  |
|--------------------|-----------|-----------|----------------------------|--|--|
| Sex (% of Females) | 38        | 39        | 0.736                      |  |  |
| HY (% of HY2)      | 71.8      | 69.6      | 0.389                      |  |  |

| Variable             | Cluster 0 (n=721) |          | Cluster 1 (n=661) |           | T-Test (p-value) |
|----------------------|-------------------|----------|-------------------|-----------|------------------|
|                      | mean              | sd       | mean              | sd        |                  |
| Age                  | 63.03             | 9.55     | 62.78             | 9.97      | 0.637            |
| Time since diagnosis | 4.33              | 4.61     | 4.06              | 4.13      | 0.256            |
| AO                   | 58.64             | 10.37    | 58.59             | 10.66     | 0.936            |
| MDS_UPDRS3           | 23.46             | 12.34    | 23.47             | 12.31     | 0.997            |
| MoCA                 | 26.46             | 3.12     | 26.28             | 3.08      | 0.444            |
| LEDD                 | 538.5             | 407.16   | 537.37            | 420.23    | 0.974            |
| ICV                  | 1510061.22        | 192953.7 | 1507961.14        | 216367.25 | 0.849            |
| L thalamus           | 6837.66           | 953.1    | 7782.48           | 1106.04   | <b>2.82E-57</b>  |
| R thalamus           | 6435.01           | 784.17   | 7208.3            | 883.19    | <b>3.45E-59</b>  |

|                     |          |         |          |         |                 |
|---------------------|----------|---------|----------|---------|-----------------|
| L lateral ventricle | 14914.79 | 8168.84 | 13022.69 | 8426.27 | <b>2.58E-05</b> |
| R lateral ventricle | 13611.54 | 7279    | 12137.42 | 8300.33 | <b>0.0005</b>   |
| L caudate           | 3364.93  | 539.87  | 3491.21  | 563.05  | <b>2.57E-05</b> |
| R caudate           | 3438.44  | 545.15  | 3561.25  | 560.12  | <b>4.51E-05</b> |
| L putamen           | 4765.49  | 789.96  | 4979.87  | 773.48  | <b>6.57E-07</b> |
| R putamen           | 4572.13  | 705.84  | 4798.44  | 717.3   | <b>5.98E-09</b> |
| L pallidum          | 1570.22  | 312.53  | 1643.55  | 340.03  | <b>4.82E-05</b> |
| R pallidum          | 1556.62  | 293.38  | 1622.55  | 321.5   | <b>8.80E-05</b> |
| L hippocampus       | 3855.58  | 565.12  | 4044.41  | 577.19  | <b>1.80E-09</b> |
| R hippocampus       | 3988.99  | 561.24  | 4168.82  | 564.63  | <b>5.30E-09</b> |
| L amygdala          | 1449.61  | 261.2   | 1509.98  | 251.79  | <b>1.59E-05</b> |
| R amygdala          | 1581.43  | 288.25  | 1648.96  | 289.98  | <b>1.81E-05</b> |
| L accumbens         | 468.07   | 138.41  | 496.25   | 141.81  | <b>0.0002</b>   |
| R accumbens         | 475.52   | 121.65  | 504.12   | 125.64  | <b>2.24E-05</b> |

**B - K=2 contribution of cohorts to cluster in percentages**

| cohort     | sample size contribution to total (%) |           |
|------------|---------------------------------------|-----------|
|            | Cluster 0                             | Cluster 1 |
| Bern_1     | 0.8                                   | 0.9       |
| CGU_1      | 12.9                                  | 10.9      |
| FSL_1      | 12.1                                  | 12.1      |
| GRAZ_1     | 5.7                                   | 5.6       |
| GRAZ_2     | 1.4                                   | 1.4       |
| Liege_1    | 1.5                                   | 1.5       |
| Liege_2    | 2.6                                   | 3         |
| Milan_1    | 1.1                                   | 1.7       |
| Neurocon_1 | 1.4                                   | 1.7       |
| Oxford_1   | 6.5                                   | 8.6       |
| PDNZ_1     | 10.7                                  | 9.4       |
| PPMI_1     | 0.7                                   | 1.2       |
| PPMI_12    | 0.8                                   | 0.9       |
| PPMI_120   | 1                                     | 1.4       |
| PPMI_154   | 0.7                                   | 0.5       |
| PPMI_18    | 0.6                                   | 0.6       |
| PPMI_196   | 0.1                                   | 0.2       |
| PPMI_23    | 0.1                                   | 0.2       |
| PPMI_28    | 0.8                                   | 0.6       |
| PPMI_289   | 1                                     | 1.1       |

|              |     |     |
|--------------|-----|-----|
| PPMI_290     | 1.2 | 1.4 |
| PPMI_291     | 0.3 | 0.6 |
| PPMI_32      | 0.8 | 1.5 |
| PPMI_327     | 0.4 | 0.5 |
| PPMI_34      | 3.9 | 3.2 |
| PPMI_40      | 0.8 | 1.1 |
| PPMI_57      | 0.8 | 0.8 |
| PPMI_6       | 0.7 | 1.2 |
| PPMI_7       | 1.5 | 1.2 |
| PPMI_88      | 1.4 | 0.9 |
| PPMI_96      | 1.4 | 1.2 |
| Penn_1       | 2.9 | 2.1 |
| RADBOUD_1    | 2.6 | 2.4 |
| Stanford_1   | 6.5 | 6.7 |
| Stanford_2   | 1.4 | 1.4 |
| Stellenbosch | 0.1 | 0.2 |
| TaoWu_1      | 1   | 0.8 |
| UNICAMP_1    | 3.7 | 4.5 |
| UOMmain_1    | 0.7 | 0.8 |
| UOMpilot_1   | 0.1 | 0.2 |
| Udal_1       | 1.7 | 1.7 |
| VUMC_2       | 3.3 | 2.7 |

**C - K=3 Sample descriptives**

|                |           |           |           | p-value |        |        |  |  |  |
|----------------|-----------|-----------|-----------|---------|--------|--------|--|--|--|
|                | Cluster 0 | Cluster 1 | Cluster 2 | 0 vs 1  | 0 vs 2 | 1 vs 2 |  |  |  |
| Sex (% F)      | 37.7      | 39        | 39.5      | 0.747   | 0.631  | 0.942  |  |  |  |
| HY1234 (% HY2) | 70.8      | 68.4      | 73.4      | 0.464   | 0.435  | 0.174  |  |  |  |

|                      | Cluster 0 (n=681) |       | Cluster 1 (n=367) |       | Cluster 2 (n=334) |       | t-test p-value |        |        |
|----------------------|-------------------|-------|-------------------|-------|-------------------|-------|----------------|--------|--------|
|                      | mean              | sd    | mean              | sd    | mean              | sd    | 0 vs 1         | 0 vs 2 | 1 vs 2 |
| Age                  | 63.13             | 9.71  | 62.51             | 10.31 | 62.9              | 9.19  | 0.335          | 0.712  | 0.604  |
| Time since diagnosis | 4.29              | 4.49  | 4.06              | 4.03  | 4.17              | 4.58  | 0.418          | 0.694  | 0.741  |
| AO                   | 58.8              | 10.44 | 58.29             | 10.8  | 58.61             | 10.33 | 0.462          | 0.788  | 0.694  |
| MDS_UPDR S3          | 23.42             | 12.12 | 22.83             | 12.55 | 24.26             | 12.49 | 0.486          | 0.327  | 0.153  |
| MoCA                 | 26.48             | 3.13  | 26.27             | 2.86  | 26.29             | 3.29  | 0.434          | 0.533  | 0.931  |

|                     |            |           |           |           |            |          |                 |                 |                 |
|---------------------|------------|-----------|-----------|-----------|------------|----------|-----------------|-----------------|-----------------|
| LEDD                | 555.65     | 421.96    | 549.54    | 444.54    | 494.52     | 358.37   | 0.889           | 0.137           | 0.237           |
| ICV                 | 1515173.22 | 197356.09 | 1511727.1 | 231610.08 | 1493651.64 | 185667.4 | 0.8             | 0.096           | 0.258           |
| L thalamus          | 7254.16    | 967.99    | 8071.7    | 1123.57   | 6489.2     | 839.6    | <b>1.63E-31</b> | <b>1.93E-31</b> | <b>1.52E-72</b> |
| R thalamus          | 6772.26    | 780.01    | 7441.9    | 896.33    | 6167.51    | 717.05   | <b>3.04E-33</b> | <b>6.01E-30</b> | <b>1.68E-72</b> |
| L lateral ventricle | 13505.02   | 7915.39   | 13185.29  | 8934.07   | 15961.29   | 8243.05  | 0.552           | <b>5.88E-06</b> | <b>2.52E-05</b> |
| R lateral ventricle | 12384.35   | 7248.29   | 12412.56  | 8938.74   | 14513.18   | 7402.81  | 0.956           | <b>1.52E-05</b> | <b>0.0008</b>   |
| L caudate           | 3395.8     | 536.48    | 3555.17   | 588.1     | 3342.42    | 528.9    | <b>1.16E-05</b> | 0.139           | <b>8.42E-07</b> |
| R caudate           | 3464.18    | 569.44    | 3618.23   | 537.25    | 3431.69    | 526.93   | <b>2.52E-05</b> | 0.388           | <b>5.49E-06</b> |
| L putamen           | 4858       | 810.11    | 5016.71   | 779.5     | 4724.07    | 728.39   | <b>0.0027</b>   | <b>0.012</b>    | <b>5.82E-07</b> |
| R putamen           | 4680.13    | 729.03    | 4845.49   | 707.6     | 4498.37    | 671.56   | <b>0.0005</b>   | <b>0.0002</b>   | <b>9.01E-11</b> |
| L pallidum          | 1609.81    | 322.71    | 1654.48   | 349.75    | 1540.83    | 302.47   | <b>0.043</b>    | <b>0.0014</b>   | <b>8.21E-06</b> |
| R pallidum          | 1600.38    | 296.91    | 1628.8    | 339.47    | 1517.29    | 285.19   | 0.165           | <b>3.19E-05</b> | <b>4.66E-06</b> |
| L hippocampus       | 3945.09    | 541.93    | 4109.24   | 611.56    | 3767.54    | 562.62   | <b>1.17E-05</b> | <b>2.10E-06</b> | <b>1.44E-13</b> |
| R hippocampus       | 4093.59    | 544.59    | 4214.28   | 591.97    | 3882.37    | 544.02   | <b>0.001</b>    | <b>1.29E-08</b> | <b>8.02E-14</b> |
| L amygdala          | 1476.59    | 245.75    | 1538.82   | 257.47    | 1415.7     | 270      | <b>0.0001</b>   | <b>0.0004</b>   | <b>1.57E-09</b> |
| R amygdala          | 1603.49    | 280.32    | 1679.57   | 296.89    | 1561.54    | 293.35   | <b>4.74E-05</b> | <b>0.0298</b>   | <b>2.31E-07</b> |
| L accumbens         | 479.64     | 137.8     | 504.29    | 148.43    | 460.29     | 134.41   | <b>0.0077</b>   | <b>0.0357</b>   | <b>5.20E-05</b> |
| R accumbens         | 489.19     | 126.24    | 513.59    | 119.4     | 462.31     | 120.6    | <b>0.0026</b>   | <b>0.0014</b>   | <b>3.03E-08</b> |

#### D - K=3 contribution of cohorts to cluster in percentages

| Cohort     | sample size contribution to total (%) |           |           |
|------------|---------------------------------------|-----------|-----------|
|            | Cluster 0                             | Cluster 1 | Cluster 2 |
| Bern_1     | 1.2                                   | 0.5       | 0.6       |
| CGU_1      | 14.4                                  | 10.1      | 9         |
| FSL_1      | 8.8                                   | 14.2      | 16.5      |
| GRAZ_1     | 5.9                                   | 5.2       | 5.7       |
| GRAZ_2     | 1.5                                   | 1.4       | 1.2       |
| Liege_1    | 0.9                                   | 1.9       | 2.4       |
| Liege_2    | 3.7                                   | 1.6       | 2.4       |
| Milan_1    | 0.9                                   | 2.2       | 1.5       |
| Neurocon_1 | 1.8                                   | 1.4       | 1.2       |
| Oxford_1   | 6.2                                   | 9         | 8.7       |
| PDNZ_1     | 9.5                                   | 10.9      | 10.2      |
| PPMI_1     | 0.9                                   | 0.8       | 1.2       |
| PPMI_12    | 0.9                                   | 0.8       | 0.9       |



|              |     |     |     |
|--------------|-----|-----|-----|
| PPMI_120     | 1   | 1.4 | 1.2 |
| PPMI_154     | 0.6 | 0.5 | 0.6 |
| PPMI_18      | 0.9 | 0.3 | 0.3 |
| PPMI_196     | 0.1 | 0.3 | 0   |
| PPMI_23      | 0.3 | 0   | 0   |
| PPMI_28      | 1.2 | 0.3 | 0.3 |
| PPMI_289     | 1   | 0.8 | 1.2 |
| PPMI_290     | 1.5 | 1.1 | 1.2 |
| PPMI_291     | 0.4 | 0.3 | 0.6 |
| PPMI_32      | 1.3 | 1.1 | 0.9 |
| PPMI_327     | 0.4 | 0.3 | 0.6 |
| PPMI_34      | 3.2 | 4.1 | 3.6 |
| PPMI_40      | 1.3 | 0.5 | 0.6 |
| PPMI_57      | 1   | 0.5 | 0.6 |
| PPMI_6       | 1   | 0.8 | 0.9 |
| PPMI_7       | 1.3 | 1.4 | 1.5 |
| PPMI_88      | 1.3 | 1.1 | 0.9 |
| PPMI_96      | 1.2 | 1.6 | 1.2 |
| Penn_1       | 3.4 | 2.2 | 1.2 |
| RADBOUD_1    | 2.8 | 2.7 | 1.8 |
| Stanford_1   | 6.9 | 6   | 6.6 |
| Stanford_2   | 1.2 | 1.9 | 1.2 |
| Stellenbosch | 0.3 | 0   | 0   |
| TaoWu_1      | 0.9 | 0.8 | 0.9 |
| UNICAMP_1    | 4   | 4.1 | 4.5 |
| UOMmain_1    | 0.7 | 0.8 | 0.6 |
| UOMpilot_1   | 0.1 | 0   | 0.3 |
| Udal_1       | 2.3 | 1.1 | 0.9 |
| VUMC_2       | 1.8 | 4.1 | 4.5 |

**Table S15. Cohort characteristics**

| Site      | Cohort                 | Diagnostic criteria | Time between MRI and clinical assessment       | MRI acquisition details                                                                                                                                                          | PD                                                                                                                                                                                                                                                                                                                                                                                                                                                                                                           | HC                                                                                                                                                                                                                                                                                                                               |
|-----------|------------------------|---------------------|------------------------------------------------|----------------------------------------------------------------------------------------------------------------------------------------------------------------------------------|--------------------------------------------------------------------------------------------------------------------------------------------------------------------------------------------------------------------------------------------------------------------------------------------------------------------------------------------------------------------------------------------------------------------------------------------------------------------------------------------------------------|----------------------------------------------------------------------------------------------------------------------------------------------------------------------------------------------------------------------------------------------------------------------------------------------------------------------------------|
| Amsterdam | Amsterdam I            | UKBB                | Same day                                       | GE Discovery (3T); Sagittal 3-dimensional gradient-echo T1-weighted sequence (256 x 256 matrix; FOV = 25cm; voxel size = 1 x 0.98 x 0.98 mm; TR = 7.8 ms; TE = 3.0 ms; FA = 12°) | Inclusion: consecutive patients seen at the movement disorders outpatient clinic.<br>Exclusion: -                                                                                                                                                                                                                                                                                                                                                                                                            | No controls                                                                                                                                                                                                                                                                                                                      |
|           | Amsterdam II (Cogtips) | UKBB                | Same day                                       |                                                                                                                                                                                  | Inclusion: Subjective cognitive complaints (PD-CFRS > 3), HY stage < 4.<br>Exclusion: dementia (SAGE <14 or MoCA < 22), drugs or alcohol abuse (CAGE AID > 1), depressive symptoms (BDI > 18), impulse control disorder (ICD criteria interview), psychotic symptoms (SAPS-PD criteria), tumors and significant vascular abnormalities.                                                                                                                                                                      | Inclusion: sex, age, and education-matched<br>Exclusion: neurological disease, indication of dementia (MoCA < 22), indication of psychotic (SAPS-PD) or depressive disorder (BDI > 18), drugs and/or alcohol abuse, inability to undergo neuropsychological assessment, traumatic brain injury, tumor or vascular abnormalities. |
|           | Amsterdam III          | UKBB                | Same day                                       |                                                                                                                                                                                  | Inclusion: early stage, non-demented PD patients who were not using dopamine replacement therapy.<br>Exclusion: current psychiatric or neurological disorders other than PD, a Beck Depression Inventory (BDI) score >15 and a Mini Mental State Examination (MMSE) score <24.                                                                                                                                                                                                                               | Inclusion: sex, age, education, and handedness-matched<br>Exclusion: current psychiatric or neurological disorders, a Beck Depression Inventory (BDI) score >15 and a Mini Mental State Examination (MMSE) score <24.                                                                                                            |
| Bern      | BE I                   | UKBB                | Within 7 days                                  | Siemens Verio (3T); MDEFT sequence (1mm <sup>3</sup> isotropic voxel; TR = 7.92ms, TE = 2.48ms, TI=910ms)                                                                        | Inclusion: PD and familial forms of typical Parkinsonian syndromes, motor complications of dopaminergic medication that are at least moderately bothersome to the patient.<br>Exclusion: Age > 85 years, surgical or medical contraindications for a deep brain stimulation (DBS)-implantation, severe medical illness, severe personality disorder, dementia (DSM-V criteria and MMSE < 20, current psychosis, ongoing major depression (BDI-II > 23) or depression of any severity with suicidal ideation. | Inclusion: sex and age-matched<br>Exclusion: -                                                                                                                                                                                                                                                                                   |
|           | BE II                  |                     |                                                | Siemens Trio Tim (3T); as above                                                                                                                                                  |                                                                                                                                                                                                                                                                                                                                                                                                                                                                                                              |                                                                                                                                                                                                                                                                                                                                  |
| Campinas  | UNICAMP                | UKBB                | 15.3 days on average (standard deviation=11.1) | Philips Achiva (3T); 3D T1 weighted image acquired on the sagittal plane (FOV of                                                                                                 | Inclusion: idiopathic PD, taking antiparkinsonian medications, age > 30 years.                                                                                                                                                                                                                                                                                                                                                                                                                               | Inclusion: age > 30 years old.<br>Exclusion: clinically significant                                                                                                                                                                                                                                                              |

|                 |                       |                                       |                                                      |                                                                                                                                                                                                 |                                                                                                                                                                                                                                                                                                                                                                         |                                                                                                                                                                                                                                             |
|-----------------|-----------------------|---------------------------------------|------------------------------------------------------|-------------------------------------------------------------------------------------------------------------------------------------------------------------------------------------------------|-------------------------------------------------------------------------------------------------------------------------------------------------------------------------------------------------------------------------------------------------------------------------------------------------------------------------------------------------------------------------|---------------------------------------------------------------------------------------------------------------------------------------------------------------------------------------------------------------------------------------------|
|                 |                       |                                       |                                                      | 240x240mm; 1mm <sup>3</sup> isotropic voxel, TR = 7ms, TE = 3.2ms; FA = 8°)                                                                                                                     | Exclusion: clinically significant musculoskeletal, cardiovascular, respiratory or other neurological disease.                                                                                                                                                                                                                                                           | musculoskeletal, cardiovascular, respiratory or neurological disease.                                                                                                                                                                       |
| Cape Town       | Cape Town             | MDS                                   | 15.0 days on average                                 | Siemens Magnetom Skyra (3T); 3D T1 weighted image acquired on the sagittal plane (FOV of 256x256mm; 1mm <sup>3</sup> isotropic voxel, TR = 2530, TE = 1.69, TI = 1100, FA = 7°)                 | Inclusion: diagnosis of PD by neurologist, age > 40 years and <= than 75 years.<br>Exclusion: Any significant medical/physical illness (other than PD), participants with metal prostheses, cardiac pacemakers or metal clips likely to interfere with ability to acquire MR image                                                                                      | Inclusion: no current or lifetime history of any DSM-5 psychiatric disorder<br>Exclusion: Neurological conditions that would preclude completion of neurocognitive tasks, current or lifetime daily psychotropic medication use.            |
| Chang Gung      | CGU                   | NINDS                                 | Within 30 days, except for one participant (45 days) | Siemens Magnetom Trio Tim (3T); T1-weighted images were acquired using an MPRAGE (224x256 matrix; FOV = 224 mm x 256 mm; 1mm <sup>3</sup> isotropic voxel; TE = 2.63 ms; TR = 2000 ms, FA = 9°) | Inclusion: diagnosis of probable PD, ability to tolerate treatment discontinuation for 12 hours.<br>Exclusion: major physical illnesses, psychiatric disorders, known brain abnormalities, history of intracranial surgery, pharmacotherapy for more than ten years or treatment with drugs able to cross the blood- brain-barrier (other than those used to treat PD). | Inclusion: aged between 50- 90.<br>Exclusion: same as in PD.                                                                                                                                                                                |
| Charlottesville | Charlottesville I-III | PD diagnosis confirmed by neurologist | 73.9 days on average                                 | Siemens (3T); Stock MPRAGE. Acquisition parameters vary by scanner protocol. Voxel size varied but did not exceed 1 x 1 x 1.2 mm.                                                               | Inclusion: PD diagnosis with a motor symptom that is not (or inconsistently) responsive to oral medication.<br>Exclusion: -                                                                                                                                                                                                                                             | No controls                                                                                                                                                                                                                                 |
| Christchurch    | Christchurch          | UKBB                                  | 28 days on average (standard deviation=48)           | General Electric HDx (3T); SPGR sequence                                                                                                                                                        | Inclusion: met the UK Parkinson's Society criteria for PD, motor symptoms present for at least 1 year at study entry.<br>Exclusion: atypical parkinsonian disorder, history of moderate/severe head injury, stroke, early-life learning disability, major psychiatric or medical illness in the previous 6 months, poor English (precluding testing).                   | Inclusion: -<br>Exclusion: neurological disease/disorder; history of moderate/severe head injury, stroke, early-life learning disability, major psychiatric or medical illness in the previous 6 months, poor English (precluding testing). |
| Donders         | Donders               | UKBB                                  | Same day                                             | Siemens Magnetom Trio (3T); 3D T1 weighted image acquired on the sagittal plane (FOV of 256x256mm;                                                                                              | Inclusion: Idiopathic PD, UPDRS tremor-score > 2, dopaminergic therapy with a clear clinical response of non-tremor symptoms (bradykinesia,                                                                                                                                                                                                                             | Inclusion: same age/gender balance as PD patients<br>Exclusion: Neurological or psychiatric disease, cognitive impairment (MMSE <                                                                                                           |

|            |                       |      |                                        |                                                                                                                                                                                                                                                                                                                                       |                                                                                                                                                                                                                                     |                                                                                                                                             |
|------------|-----------------------|------|----------------------------------------|---------------------------------------------------------------------------------------------------------------------------------------------------------------------------------------------------------------------------------------------------------------------------------------------------------------------------------------|-------------------------------------------------------------------------------------------------------------------------------------------------------------------------------------------------------------------------------------|---------------------------------------------------------------------------------------------------------------------------------------------|
|            |                       |      |                                        | 1mm <sup>3</sup> isotropic voxel, TR = 2300, TE = 3.03, TI = 1100, FA = 8°)                                                                                                                                                                                                                                                           | rigidity), HY stage 1-3.<br>Exclusion: Neurological or psychiatric comorbidity, severe head tremor or dyskinesias, cognitive impairment (MMSE < 26), co-medication associated with elongated QT-time, pregnancy, age < 25 years.    | 26), medication associated with elongated QT-time, pregnancy, age < 25 years.                                                               |
| Graz       | PROMOVE/<br>ASPS I&II | QSBB | 90% same day,<br>maximum of 4<br>weeks | Siemens Magnetom Trio/Prisma (3T); PD: structural T1-weighted MPRAGE sequence (1mm <sup>3</sup> isotropic voxel; TR = 1900ms; TI = 900ms; FA = 9°; + TE: 2.19ms (101 patients) + TE: 2.7ms (23 patients) HC: structural T1-weighted MPRAGE sequence (1mm <sup>3</sup> isotropic voxel; TR = 1900ms; TE = 2.19ms; TI = 900ms; FA = 9°) | Inclusion: Clinical diagnosis of PD.<br>Exclusion: MMSE <24, secondary parkinsonism, atypical parkinsonian diseases, a history of neuroleptic drugs, structural abnormalities on routine MRI scans or a history of previous stroke. | Inclusion: No history of previous stroke or dementia and a normal neurologic examination.<br>Exclusion: -                                   |
| Liege      | Liege I & II          | UKBB | Same day                               | Siemens Magnetom Allegra (3T); 3D multi-echo fast low angle shot (FLASH) sequence, (256 × 224 matrix; 1mm <sup>3</sup> isotropic voxel; TR = 18.7 ms; TE = 2.2-14.7 ms; FA = 20°)                                                                                                                                                     | Inclusion: Non-demented PD patients.<br>Exclusion: -                                                                                                                                                                                | Inclusion: age, sex, and highest achieved education level matched.<br>Exclusion: -                                                          |
| Manchester | NW-England I          | UKBB | Same day                               | Philips Achieva (3T); MPRAGE IR Method (voxel size 0.94 x 0.94 x 1 mm; FOV 240 (AP) x 192 (RL) mm TR=8.4ms, TE=3.9ms, TI=1150ms, FA = 8°)                                                                                                                                                                                             | Inclusion: PD diagnosis without known clinical cardiovascular disease or dementia. No other significant neurological conditions.<br>Exclusion: -                                                                                    | Inclusion: age-matched to PD group and without a history of idiopathic PD or clinical CVD, or any other significant neurological condition. |
|            | NW-England II         | UKBB | Same day                               |                                                                                                                                                                                                                                                                                                                                       | Inclusion: as above.<br>Exclusion: -                                                                                                                                                                                                | Inclusion: age-matched to PD group and without a history of idiopathic PD or other significant neurological condition.                      |
| Milan      | Milan                 | UKBB | Within 1 month                         | Philips Achieva (3T); 240x240mm matrix; 1mm <sup>3</sup> isotropic voxel; FOV = 33.7x24 cm; TR = 9.81ms; TE = 4.6ms; FA = 8°                                                                                                                                                                                                          | Inclusion: PD diagnosis.<br>Exclusion: -                                                                                                                                                                                            | Inclusion: -<br>Exclusion: -                                                                                                                |

|              |                  |      |                                                                                                            |                                                                                                                                           |                                                                                                                                                                                                                                                                                                                                                                                                                                                                                                                     |                                                                                                                                                                                                                                                       |
|--------------|------------------|------|------------------------------------------------------------------------------------------------------------|-------------------------------------------------------------------------------------------------------------------------------------------|---------------------------------------------------------------------------------------------------------------------------------------------------------------------------------------------------------------------------------------------------------------------------------------------------------------------------------------------------------------------------------------------------------------------------------------------------------------------------------------------------------------------|-------------------------------------------------------------------------------------------------------------------------------------------------------------------------------------------------------------------------------------------------------|
| NEUROCON     | NEUROCON         | MDS  | Not available                                                                                              | Siemens Avanto (1.5T); MPRAGE IR Method. (voxel size 0.97 x 0.97 x 1mm; TR 1940ms TE 3.08ms)                                              | Inclusion: Early- or moderate stage of PD.<br>Exclusion: -                                                                                                                                                                                                                                                                                                                                                                                                                                                          | Inclusion: no history of neurological or psychiatric disease.                                                                                                                                                                                         |
| ON Japan     | ON Japan         | UKBB | Not available                                                                                              | Siemens Magnetom Verio (3T); High resolution T1-weighted images (256 x 256 matrix size; FOV = 256 mm; TR = 2.5 s, TE = 2.48 ms)           | Inclusion: -<br>Exclusion: history of other neurological or psychiatric disease, focal white matter abnormalities. ACE-R score ≤ 88, psychiatric symptoms (hallucinations, depression etc)                                                                                                                                                                                                                                                                                                                          | Inclusion: -<br>Exclusion: neurological disease, family history of PD, or hyposmia, and with an ACE-R score > 88 in the study                                                                                                                         |
| Oxford       | Oxford DISCOVERY | UKBB | 108 days on average (standard deviation=104)                                                               | Siemens Trio (3T); MPRAGE (1mm <sup>3</sup> isotropic voxel, TE = 4.7 ms; TR = 2040 ms; TI ¼ = 900ms; FA: 8°)                             | Inclusion: PD diagnosis within the past 3.5 years. Full details of criteria are available at: Szewczyk-Krolkowski K et. al. (2013). No atypical features to suggest an alternative diagnosis.<br>Exclusion: secondary parkinsonism due to head trauma or medication use, atypical parkinsonism syndromes (multiple system atrophy, progressive supra nuclear palsy, corticobasal degeneration, dementia with Lewy bodies), documented postural BP drop on standardized measurement or significant urinary symptoms. | Inclusion: controls without blood relatives with PD.                                                                                                                                                                                                  |
| Pennsylvania | Pennsylvania     | UKBB | MoCA: 53.7 days on average (standard deviation=67.1)<br>HY: 51.4 days on average (standard deviation=65.0) | Siemens Trio/Prisma (3T); 3D MPRAGE Sagittal & Axial (Slice thickness = 1mm; TR = 1620/1800/2300ms; TE = 2.95/3.8/3.09ms; TI = 900/950ms) | Inclusion: clinical diagnosis of PD.<br>Exclusion: -                                                                                                                                                                                                                                                                                                                                                                                                                                                                | Inclusion: >40 years of age, MMSE > 27, a negative self-reported history of neurological or psychiatric condition, and MRI safe (e.g., no metal, claustrophobia).<br>Exclusion: -                                                                     |
| PPMI         | PPMI 1-21        | MDS  | Same day                                                                                                   | Siemens Trio Tim (3T); T1-3D e.g. MPRAGE, SPGR, Sagittal (56 x 256 x 170-200 matrix; Slice thickness = 1.2mm; voxel size 1x1x1.2mm)       | Inclusion & Exclusion criteria detailed here:<br><a href="http://www.ppmi-info.org/wp-content/uploads/2013/02/PPMI-Protocol-AM5-Final-27Nov2012v6-2.pdf">www.ppmi-info.org/wp-content/uploads/2013/02/PPMI-Protocol-AM5-Final-27Nov2012v6-2.pdf</a> .                                                                                                                                                                                                                                                               | Inclusion & Exclusion criteria detailed here:<br><a href="http://www.ppmi-info.org/wp-content/uploads/2013/02/PPMI-Protocol-AM5-Final-27Nov2012v6-2.pdf">www.ppmi-info.org/wp-content/uploads/2013/02/PPMI-Protocol-AM5-Final-27Nov2012v6-2.pdf</a> . |
| Rome SLF     | Rome SLF         | MDS  | 1 day                                                                                                      | Siemens Allegra (3T); T1 MDEFT (256x224 matrix; 1mm <sup>3</sup> isotropic voxel; TR =                                                    | Inclusion: diagnosis of idiopathic, MMSE score>26, no dementia.<br>Exclusion: presence of major non stabilized medical, known or suspected                                                                                                                                                                                                                                                                                                                                                                          | Inclusion: vision and hearing sufficient for compliance with testing procedures, laboratory values within normal reference intervals, neuropsychological domain                                                                                       |

|          |          |               |                 |                                                                                                                                                                                                                                                                          |                                                                                                                                                                                                                                                                                                                                                                                                                                                             |                                                                                                                                                                                                                                                                                                                                                                                                                   |
|----------|----------|---------------|-----------------|--------------------------------------------------------------------------------------------------------------------------------------------------------------------------------------------------------------------------------------------------------------------------|-------------------------------------------------------------------------------------------------------------------------------------------------------------------------------------------------------------------------------------------------------------------------------------------------------------------------------------------------------------------------------------------------------------------------------------------------------------|-------------------------------------------------------------------------------------------------------------------------------------------------------------------------------------------------------------------------------------------------------------------------------------------------------------------------------------------------------------------------------------------------------------------|
|          |          |               |                 | 7.92ms; TE = 2.4ms; FA = 15°                                                                                                                                                                                                                                             | history of alcoholism, drug dependence and abuse, head trauma, and mental disorders (apart from mood or anxiety disorders, history of neurological diseases other than idiopathic PD, unclear history of chronic dopaminergic treatment responsiveness.                                                                                                                                                                                                     | scores above normal cognitive level cutoff scores, corrected for age and educational level.<br>Exclusion: dementia or MCI diagnosis, confirmed by a comprehensive neuropsychological battery, MMSE score < 26, presence of major non stabilized medical illnesses, known or suspected history of alcoholism, drug dependence and abuse, head trauma, and mental disorders (apart from mood or anxiety disorders). |
| Stanford | Stanford | UKBB          | Within 3 months | General Electric SIGNA (3T); FSPGR 3D T1 scan                                                                                                                                                                                                                            | Inclusion: > 20% improvement on MDS-UPDRS part III ON meds compared to OFF meds.<br>Exclusion: -                                                                                                                                                                                                                                                                                                                                                            | Inclusion: normal neurological exam and normal neuropsychiatric battery (within 1.5 SD of age- and education- adjusted norms).<br>Exclusion: -                                                                                                                                                                                                                                                                    |
| Tao Wu   | Tao Wu   | MDS           | 1-2 days        | Siemens Magnetom Trio (3T); MPRAGE IR method (1mm <sup>3</sup> isotropic voxel; TR 1100ms; TE 3.39ms)                                                                                                                                                                    | Inclusion: diagnosis of PD based on medical history, physical and neurological examinations, response to levodopa or dopaminergic drugs, and laboratory tests and MRI scans to exclude other diseases.<br>Exclusion: -                                                                                                                                                                                                                                      | Inclusion: -<br>Exclusion: -                                                                                                                                                                                                                                                                                                                                                                                      |
| Udall    | Udall    | Not available | Not available   | Philips Achieva (3T); sagittal T1-weighted 3D MPRAGE (176 slices, matrix size = 256 × 256, inversion time = 1100 ms, turbo-field echo factor = 225, repetition time = 7.46 ms, echo time = 3.49 ms, flip angle = 7°, shot interval = 2530 ms) with 1 mm isotropic voxels | Inclusion:<br>Exclusion: Potential participants were excluded if they had a history of any primary neurodegenerative disease other than idiopathic PD, brain surgery (including placement of a deep brain stimulator), moderate to severe dyskinesia, significant head trauma, stroke history, severe or unstable cardiovascular disease, contraindications to MRI, or a Montreal Cognitive Assessment score (MoCA) (Nasreddine et al., 2005) lower than 23 | Not available                                                                                                                                                                                                                                                                                                                                                                                                     |

Scanner protocol information for each sample included in analyses. Abbreviations: PD = Parkinson's disease; HC = healthy controls; TR = Repetition Time; TE = Echo time; TI = Inversion time; FOV = field of view; FA = flip angle

### Table SI6A-H. Results Jacobian Determinant

Corrected for age, sex and intracranial volume as fixed factors, and cohort as random intercept. Abbreviations: MoCA, Montreal Cognitive Assessment; MDS-UPDRS3 OFF, Movement Disorders Society sponsored revision of the Unified Parkinson's disease rating scale part 3 assessed in OFF medication state.

#### A - Complete sample PD vs controls

| ROI            | n vertices   | n (%) significant  | n (%) thicker     | n (%) thinner      | thicker max beta | thinner max beta |
|----------------|--------------|--------------------|-------------------|--------------------|------------------|------------------|
| L thalamus     | 2502         | 9 (0.4)            | 9 (0.4)           | 0 (0)              | 0.02             | 0                |
| R thalamus     | 2502         | 87 (3.5)           | 0 (0)             | 87 (3.5)           | 0                | -0.03            |
| L caudate      | 2502         | 606 (24.2)         | 0 (0)             | 606 (24.2)         | 0                | -0.04            |
| R caudate      | 2502         | 722 (28.9)         | 87 (3.5)          | 635 (25.4)         | 0.02             | -0.03            |
| L putamen      | 2502         | 323 (12.9)         | 223 (8.9)         | 100 (4)            | 0.04             | -0.03            |
| R putamen      | 2502         | 365 (14.6)         | 103 (4.1)         | 262 (10.5)         | 0.03             | -0.02            |
| L pallidum     | 1254         | 631 (25.2)         | 631 (25.2)        | 0 (0)              | 0.03             | 0                |
| R pallidum     | 1254         | 1299 (51.9)        | 1299 (51.9)       | 0 (0)              | 0.04             | 0                |
| L hippocampus  | 2502         | 130 (9.5)          | 0 (0)             | 130 (9.5)          | 0                | -0.04            |
| R hippocampus  | 2502         | 13 (1)             | 0 (0)             | 13 (1)             | 0                | -0.02            |
| L amygdala     | 1368         | 475 (37.9)         | 5 (0.4)           | 470 (37.5)         | 0.03             | -0.05            |
| R amygdala     | 1368         | 585 (46.7)         | 108 (8.6)         | 477 (38)           | 0.04             | -0.04            |
| L accumbens    | 930          | 186 (20)           | 0 (0)             | 186 (20)           | 0                | -0.06            |
| R accumbens    | 930          | 348 (37.4)         | 0 (0)             | 348 (37.4)         | 0                | -0.06            |
| <b>Overall</b> | <b>27120</b> | <b>5779 (22.4)</b> | <b>2465 (7.4)</b> | <b>3314 (15.1)</b> | <b>0.04</b>      | <b>-0.06</b>     |

#### B - HY1 vs controls

| ROI            | n vertices   | n (%) significant | n (%) thicker    | n (%) thinner    | thicker max beta | thinner max beta |
|----------------|--------------|-------------------|------------------|------------------|------------------|------------------|
| L thalamus     | 2502         | 0 (0)             | 0 (0)            | 0 (0)            | 0                | 0                |
| R thalamus     | 2502         | 0 (0)             | 0 (0)            | 0 (0)            | 0                | 0                |
| L caudate      | 2502         | 33 (1.3)          | 0 (0)            | 33 (1.3)         | 0                | -0.03            |
| R caudate      | 2502         | 0 (0)             | 0 (0)            | 0 (0)            | 0                | 0                |
| L putamen      | 2502         | 63 (2.5)          | 63 (2.5)         | 0 (0)            | 0.03             | 0                |
| R putamen      | 2502         | 7 (0.3)           | 7 (0.3)          | 0 (0)            | 0.03             | 0                |
| L pallidum     | 1254         | 26 (1)            | 26 (1)           | 0 (0)            | 0.04             | 0                |
| R pallidum     | 1254         | 133 (5.3)         | 133 (5.3)        | 0 (0)            | 0.04             | 0                |
| L hippocampus  | 2502         | 0 (0)             | 0 (0)            | 0 (0)            | 0                | 0                |
| R hippocampus  | 2502         | 0 (0)             | 0 (0)            | 0 (0)            | 0                | 0                |
| L amygdala     | 1368         | 162 (12.9)        | 0 (0)            | 162 (12.9)       | 0                | -0.07            |
| R amygdala     | 1368         | 131 (10.4)        | 0 (0)            | 131 (10.4)       | 0                | -0.05            |
| L accumbens    | 930          | 0 (0)             | 0 (0)            | 0 (0)            | 0                | 0                |
| R accumbens    | 930          | 0 (0)             | 0 (0)            | 0 (0)            | 0                | 0                |
| <b>Overall</b> | <b>27120</b> | <b>555 (2.4)</b>  | <b>229 (0.7)</b> | <b>326 (1.8)</b> | <b>0.04</b>      | <b>-0.07</b>     |

#### C - HY2 vs controls

| ROI        | n vertices | n (%) significant | n (%) thicker | n (%) thinner | thicker max beta | thinner max beta |
|------------|------------|-------------------|---------------|---------------|------------------|------------------|
| L thalamus | 2502       | 0 (0)             | 0 (0)         | 0 (0)         | 0                | 0                |

|                |              |                 |                  |                   |             |              |
|----------------|--------------|-----------------|------------------|-------------------|-------------|--------------|
| R thalamus     | 2502         | 36 (1.4)        | 0 (0)            | 36 (1.4)          | 0           | -0.03        |
| L caudate      | 2502         | 202 (8.1)       | 0 (0)            | 202 (8.1)         | 0           | -0.04        |
| R caudate      | 2502         | 277 (11.1)      | 0 (0)            | 277 (11.1)        | 0           | -0.03        |
| L putamen      | 2502         | 29 (1.2)        | 29 (1.2)         | 0 (0)             | 0.03        | 0            |
| R putamen      | 2502         | 63 (2.5)        | 0 (0)            | 63 (2.5)          | 0           | -0.02        |
| L pallidum     | 1254         | 132 (5.3)       | 132 (5.3)        | 0 (0)             | 0.03        | 0            |
| R pallidum     | 1254         | 585 (23.4)      | 550 (22)         | 35 (1.4)          | 0.03        | -0.03        |
| L hippocampus  | 2502         | 0 (0)           | 0 (0)            | 0 (0)             | 0           | 0            |
| R hippocampus  | 2502         | 5 (0.4)         | 0 (0)            | 5 (0.4)           | 0           | -0.03        |
| L amygdala     | 1368         | 12 (1)          | 12 (1)           | 0 (0)             | 0.03        | 0            |
| R amygdala     | 1368         | 74 (5.9)        | 36 (2.9)         | 38 (3)            | 0.04        | -0.03        |
| L accumbens    | 930          | 177 (19)        | 0 (0)            | 177 (19)          | 0           | -0.07        |
| R accumbens    | 930          | 305 (32.8)      | 0 (0)            | 305 (32.8)        | 0           | -0.08        |
| <b>Overall</b> | <b>27120</b> | <b>1897 (8)</b> | <b>759 (2.3)</b> | <b>1138 (5.7)</b> | <b>0.04</b> | <b>-0.08</b> |

#### D - HY3 vs controls

| ROI            | n vertices   | n (%) significant  | n (%) thicker        | n (%) thinner      | thicker max beta | thinner max beta |
|----------------|--------------|--------------------|----------------------|--------------------|------------------|------------------|
| L thalamus     | 2502         | 168 (6.7)          | 0 (0)                | 168 (6.7)          | 0                | -0.06            |
| R thalamus     | 2502         | 1100 (44)          | 0 (0)                | 1100 (44)          | 0                | -0.06            |
| L caudate      | 2502         | 1410 (56.4)        | 0 (0)                | 1410 (56.4)        | 0                | -0.09            |
| R caudate      | 2502         | 1367 (54.6)        | 0 (0)                | 1367 (54.6)        | 0                | -0.08            |
| L putamen      | 2502         | 562 (22.5)         | 0 (0)                | 562 (22.5)         | 0                | -0.05            |
| R putamen      | 2502         | 490 (19.6)         | 0 (0)                | 490 (19.6)         | 0                | -0.05            |
| L pallidum     | 1254         | 330 (13.2)         | 0 (0)                | 330 (13.2)         | 0                | -0.04            |
| R pallidum     | 1254         | 68 (2.7)           | 10 (0.4)             | 58 (2.3)           | 0.03             | -0.03            |
| L hippocampus  | 2502         | 802 (58.6)         | 0 (0)                | 802 (58.6)         | 0                | -0.11            |
| R hippocampus  | 2502         | 1024 (74.9)        | 0 (0)                | 1024 (74.9)        | 0                | -0.13            |
| L amygdala     | 1368         | 453 (36.1)         | 0 (0)                | 453 (36.1)         | 0                | -0.1             |
| R amygdala     | 1368         | 325 (25.9)         | 0 (0)                | 325 (25.9)         | 0                | -0.1             |
| L accumbens    | 930          | 388 (41.7)         | 0 (0)                | 388 (41.7)         | 0                | -0.12            |
| R accumbens    | 930          | 613 (65.9)         | 0 (0)                | 613 (65.9)         | 0                | -0.13            |
| <b>Overall</b> | <b>27120</b> | <b>9100 (37.3)</b> | <b>10 (&lt; 0.1)</b> | <b>9090 (37.3)</b> | <b>0.03</b>      | <b>-0.13</b>     |

#### E - HY45 vs controls

| ROI        | n vertices | n (%) significant | n (%) thicker | n (%) thinner | thicker max beta | thinner max beta |
|------------|------------|-------------------|---------------|---------------|------------------|------------------|
| L thalamus | 2502       | 1355 (54.2)       | 0 (0)         | 1355 (54.2)   | 0                | -0.12            |
| R thalamus | 2502       | 1283 (51.3)       | 0 (0)         | 1283 (51.3)   | 0                | -0.13            |
| L caudate  | 2502       | 1339 (53.5)       | 0 (0)         | 1339 (53.5)   | 0                | -0.15            |
| R caudate  | 2502       | 1305 (52.2)       | 22 (0.9)      | 1283 (51.3)   | 0.05             | -0.17            |
| L putamen  | 2502       | 263 (10.5)        | 107 (4.3)     | 156 (6.2)     | 0.11             | -0.07            |
| R putamen  | 2502       | 474 (18.9)        | 164 (6.6)     | 310 (12.4)    | 0.1              | -0.09            |
| L pallidum | 1254       | 496 (19.8)        | 26 (1)        | 470 (18.8)    | 0.06             | -0.05            |
| R pallidum | 1254       | 799 (31.9)        | 11 (0.4)      | 788 (31.5)    | 0.05             | -0.07            |



|                |              |                     |                  |                     |             |              |
|----------------|--------------|---------------------|------------------|---------------------|-------------|--------------|
| L hippocampus  | 2502         | 857 (62.6)          | 0 (0)            | 857 (62.6)          | 0           | -0.19        |
| R hippocampus  | 2502         | 884 (64.6)          | 0 (0)            | 884 (64.6)          | 0           | -0.21        |
| L amygdala     | 1368         | 573 (45.7)          | 0 (0)            | 573 (45.7)          | 0           | -0.11        |
| R amygdala     | 1368         | 220 (17.5)          | 0 (0)            | 220 (17.5)          | 0           | -0.11        |
| L accumbens    | 930          | 790 (84.9)          | 0 (0)            | 790 (84.9)          | 0           | -0.2         |
| R accumbens    | 930          | 554 (59.6)          | 0 (0)            | 554 (59.6)          | 0           | -0.25        |
| <b>Overall</b> | <b>27120</b> | <b>11192 (44.8)</b> | <b>330 (0.9)</b> | <b>10862 (43.9)</b> | <b>0.11</b> | <b>-0.25</b> |

#### F - Time since diagnosis in PD

| ROI            | n vertices   | n (%) significant  | n (%) positive | n (%) negative     | positive beta max | negative beta max |
|----------------|--------------|--------------------|----------------|--------------------|-------------------|-------------------|
| L thalamus     | 2502         | 771 (30.8)         | 0 (0)          | 771 (30.8)         | 0                 | -0.003            |
| R thalamus     | 2502         | 21 (0.8)           | 0 (0)          | 21 (0.8)           | 0                 | -0.002            |
| L caudate      | 2502         | 439 (17.5)         | 0 (0)          | 439 (17.5)         | 0                 | -0.005            |
| R caudate      | 2502         | 1125 (45)          | 0 (0)          | 1125 (45)          | 0                 | -0.005            |
| L putamen      | 2502         | 1135 (45.4)        | 0 (0)          | 1135 (45.4)        | 0                 | -0.004            |
| R putamen      | 2502         | 769 (30.7)         | 0 (0)          | 769 (30.7)         | 0                 | -0.004            |
| L pallidum     | 1254         | 136 (5.4)          | 0 (0)          | 136 (5.4)          | 0                 | -0.002            |
| R pallidum     | 1254         | 263 (10.5)         | 0 (0)          | 263 (10.5)         | 0                 | -0.002            |
| L hippocampus  | 2502         | 889 (65)           | 0 (0)          | 889 (65)           | 0                 | -0.005            |
| R hippocampus  | 2502         | 1050 (76.8)        | 0 (0)          | 1050 (76.8)        | 0                 | -0.007            |
| L amygdala     | 1368         | 0 (0)              | 0 (0)          | 0 (0)              | 0                 | 0                 |
| R amygdala     | 1368         | 0 (0)              | 0 (0)          | 0 (0)              | 0                 | 0                 |
| L accumbens    | 930          | 576 (61.9)         | 0 (0)          | 576 (61.9)         | 0                 | -0.008            |
| R accumbens    | 930          | 357 (38.4)         | 0 (0)          | 357 (38.4)         | 0                 | -0.006            |
| <b>Overall</b> | <b>27120</b> | <b>7531 (30.6)</b> | <b>0 (0)</b>   | <b>7531 (30.6)</b> | <b>0</b>          | <b>-0.008</b>     |

#### G - MoCA in PD

| ROI            | n vertices   | n (%) significant  | n (%) positive     | n (%) negative   | positive beta max | negative beta max |
|----------------|--------------|--------------------|--------------------|------------------|-------------------|-------------------|
| L thalamus     | 2502         | 307 (12.3)         | 303 (12.1)         | 4 (0.2)          | 0.008             | -0.004            |
| R thalamus     | 2502         | 378 (15.1)         | 319 (12.8)         | 59 (2.4)         | 0.007             | -0.006            |
| L caudate      | 2502         | 442 (17.7)         | 442 (17.7)         | 0 (0)            | 0.007             | 0                 |
| R caudate      | 2502         | 629 (25.1)         | 629 (25.1)         | 0 (0)            | 0.009             | 0                 |
| L putamen      | 2502         | 125 (5)            | 0 (0)              | 125 (5)          | 0                 | -0.009            |
| R putamen      | 2502         | 436 (17.4)         | 169 (6.8)          | 267 (10.7)       | 0.008             | -0.008            |
| L pallidum     | 1254         | 171 (6.8)          | 124 (5)            | 47 (1.9)         | 0.004             | -0.005            |
| R pallidum     | 1254         | 273 (10.9)         | 273 (10.9)         | 0 (0)            | 0.007             | 0                 |
| L hippocampus  | 2502         | 324 (23.7)         | 324 (23.7)         | 0 (0)            | 0.011             | 0                 |
| R hippocampus  | 2502         | 457 (33.4)         | 457 (33.4)         | 0 (0)            | 0.011             | 0                 |
| L amygdala     | 1368         | 0 (0)              | 0 (0)              | 0 (0)            | 0                 | 0                 |
| R amygdala     | 1368         | 0 (0)              | 0 (0)              | 0 (0)            | 0                 | 0                 |
| L accumbens    | 930          | 83 (8.9)           | 83 (8.9)           | 0 (0)            | 0.011             | 0                 |
| R accumbens    | 930          | 254 (27.3)         | 254 (27.3)         | 0 (0)            | 0.013             | 0                 |
| <b>Overall</b> | <b>27120</b> | <b>3879 (14.5)</b> | <b>3377 (13.1)</b> | <b>502 (1.4)</b> | <b>0.013</b>      | <b>-0.009</b>     |

### H - MDS-UPDRS3 Off in PD

| ROI            | n vertices   | n (%) significant | n (%) positive    | n (%) negative     | positive beta max | negative beta max |
|----------------|--------------|-------------------|-------------------|--------------------|-------------------|-------------------|
| L thalamus     | 2502         | 843 (33.7)        | 0 (0)             | 843 (33.7)         | 0                 | -0.002            |
| R thalamus     | 2502         | 512 (20.5)        | 0 (0)             | 512 (20.5)         | 0                 | -0.001            |
| L caudate      | 2502         | 472 (18.9)        | 233 (9.3)         | 239 (9.6)          | 0.002             | -0.002            |
| R caudate      | 2502         | 280 (11.2)        | 59 (2.4)          | 221 (8.8)          | < 0.001           | -0.002            |
| L putamen      | 2502         | 42 (1.7)          | 14 (0.6)          | 28 (1.1)           | 0.001             | < -0.001          |
| R putamen      | 2502         | 715 (28.6)        | 715 (28.6)        | 0 (0)              | 0.002             | 0                 |
| L pallidum     | 1254         | 130 (5.2)         | 0 (0)             | 130 (5.2)          | 0                 | -0.001            |
| R pallidum     | 1254         | 332 (13.3)        | 0 (0)             | 332 (13.3)         | 0                 | -0.001            |
| L hippocampus  | 2502         | 271 (19.8)        | 0 (0)             | 271 (19.8)         | 0                 | -0.002            |
| R hippocampus  | 2502         | 689 (50.4)        | 0 (0)             | 689 (50.4)         | 0                 | -0.002            |
| L amygdala     | 1368         | 129 (10.3)        | 129 (10.3)        | 0 (0)              | 0.001             | 0                 |
| R amygdala     | 1368         | 100 (8)           | 100 (8)           | 0 (0)              | 0.002             | 0                 |
| L accumbens    | 930          | 81 (8.7)          | 0 (0)             | 81 (8.7)           | 0                 | -0.002            |
| R accumbens    | 930          | 596 (64.1)        | 0 (0)             | 596 (64.1)         | 0                 | -0.004            |
| <b>Overall</b> | <b>27120</b> | <b>5192 (21)</b>  | <b>1250 (4.2)</b> | <b>3942 (16.8)</b> | <b>0.002</b>      | <b>-0.004</b>     |

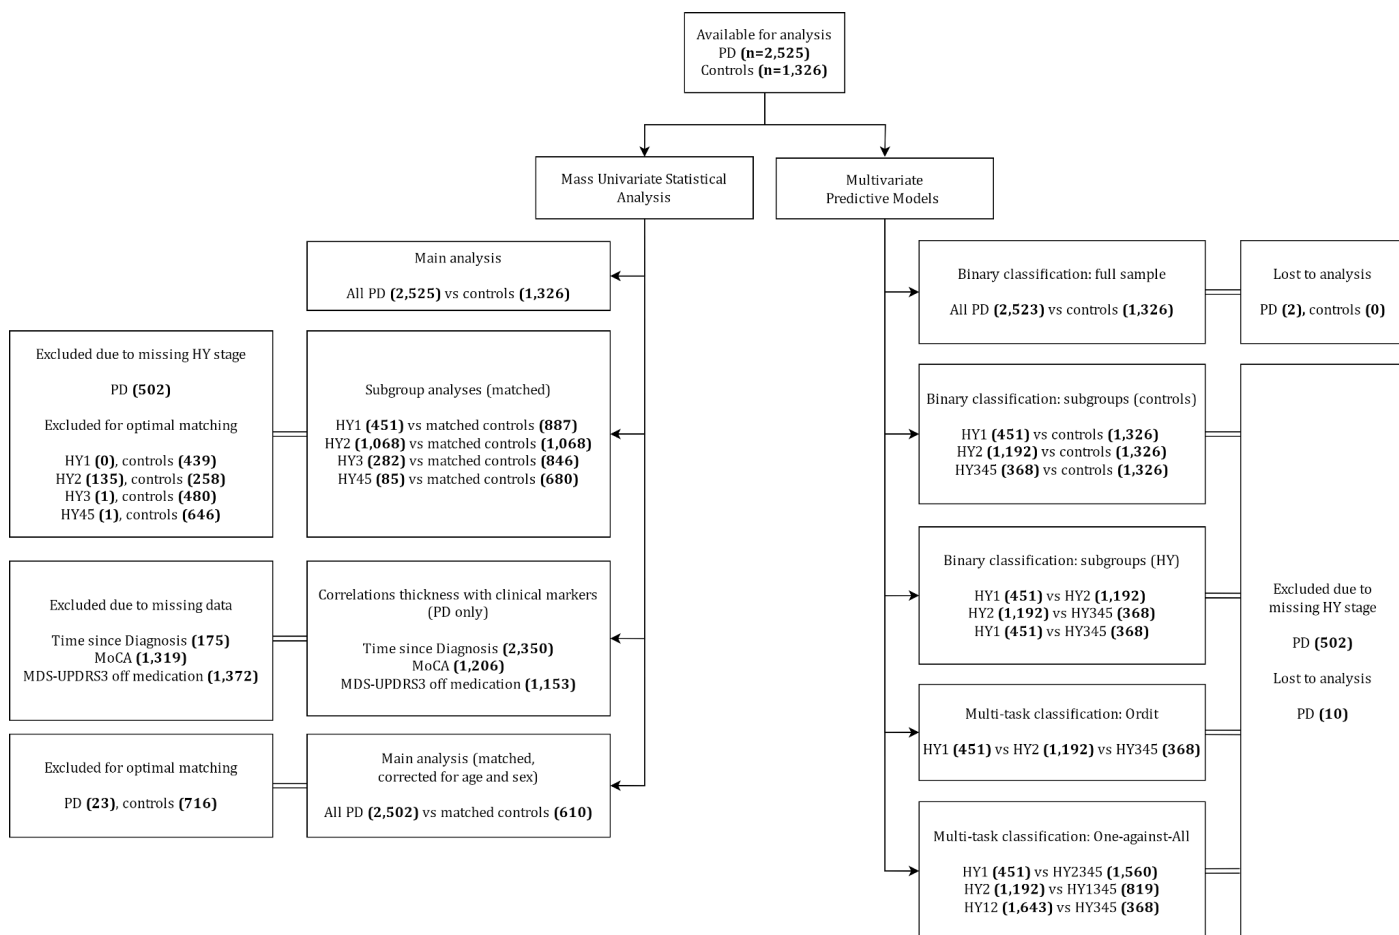

**Figure S1. Flowchart of data inclusion.**

Schematic overview of available datasets for each analysis, categorized by ‘Mass Univariate Statistical Analysis’ and ‘Multivariate Predictive Models’. For the univariate analyses, we performed group comparison and correlation analysis on radial thickness. For the multivariate analyses, binary classification and multi-task classification were performed. Abbreviations: PD, Parkinson’s disease; MoCA, Montreal Cognitive Assessment; MDS-UPDRS3, Movement Disorder Society sponsored revision of the Unified Parkinson’s Disease Rating Scale part 3; HY, Hoehn and Yahr.

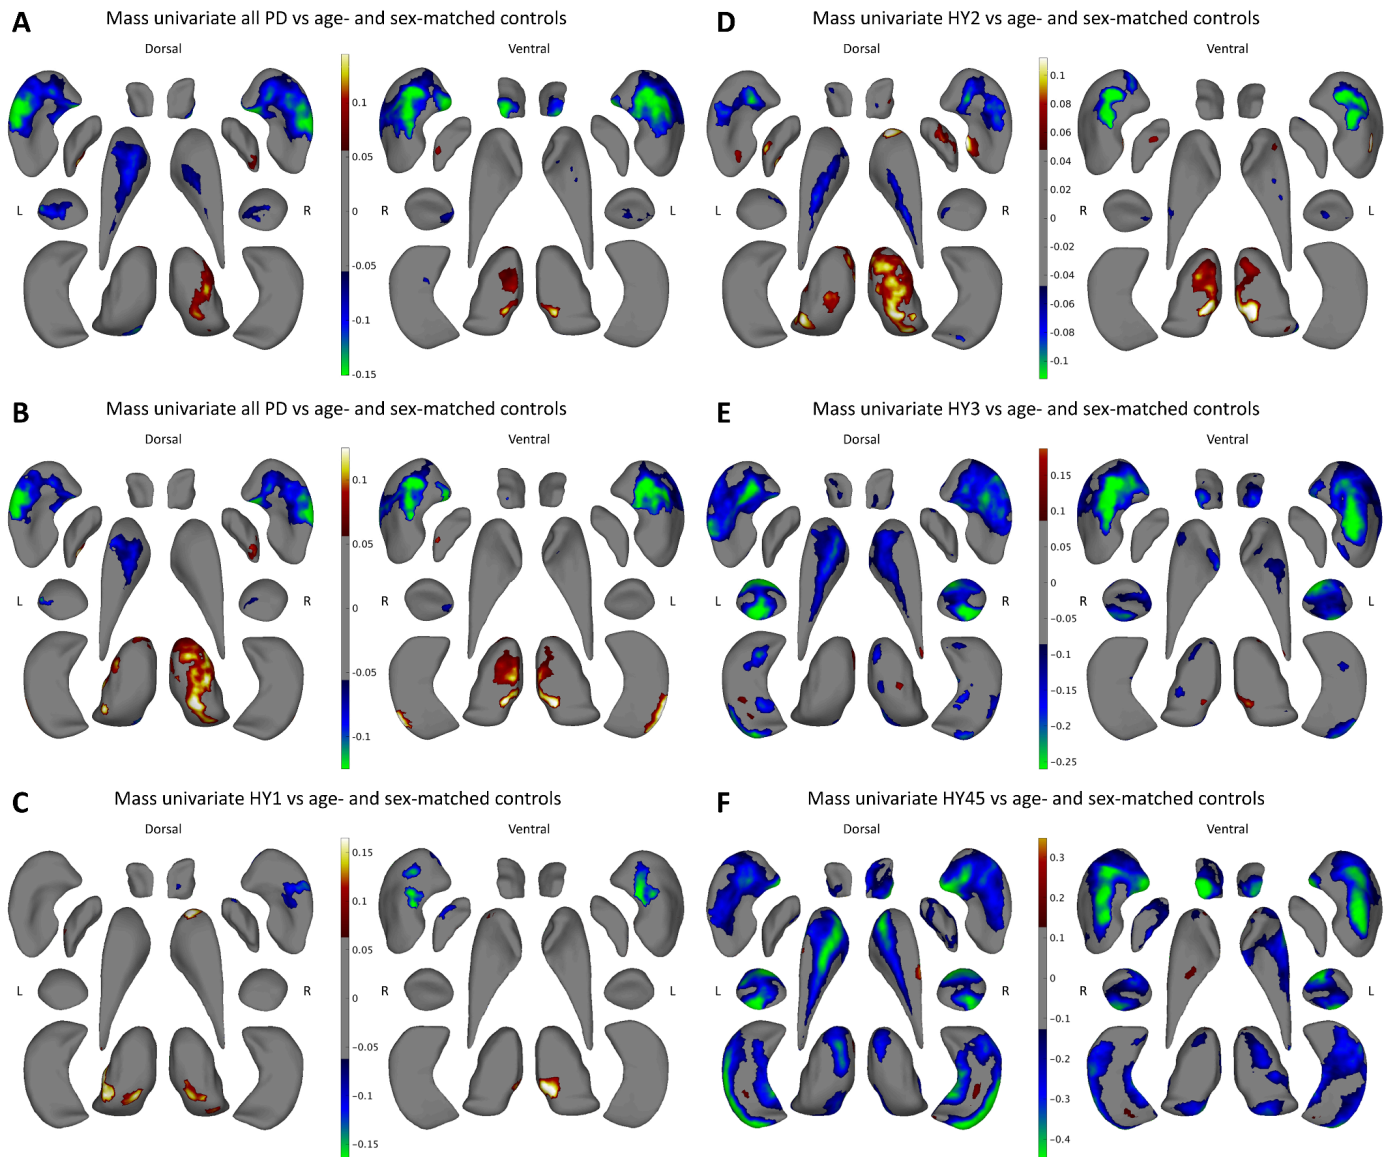

**Figure S2A-F. Mass univariate analysis: significant vertex-wise differences in thickness between people with PD and controls.**

Effect maps are projected onto the subcortical regions showing (A-B) the PD versus controls and (C-F) subgroup comparisons. Positive b-values indicate that regions are thicker, negative b-values indicate that regions are thinner in PD compared to controls. All groups are sex- and age-matched (A-F). The models are corrected for intracranial volume and cohort in all panels, and additionally corrected for age and sex in panel B.

**A**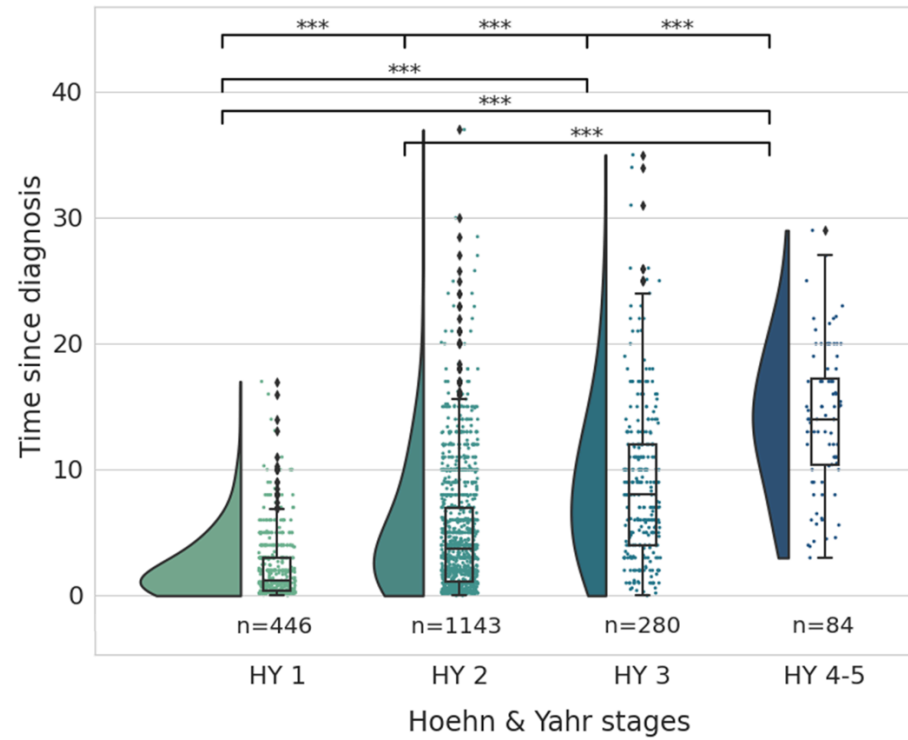**B**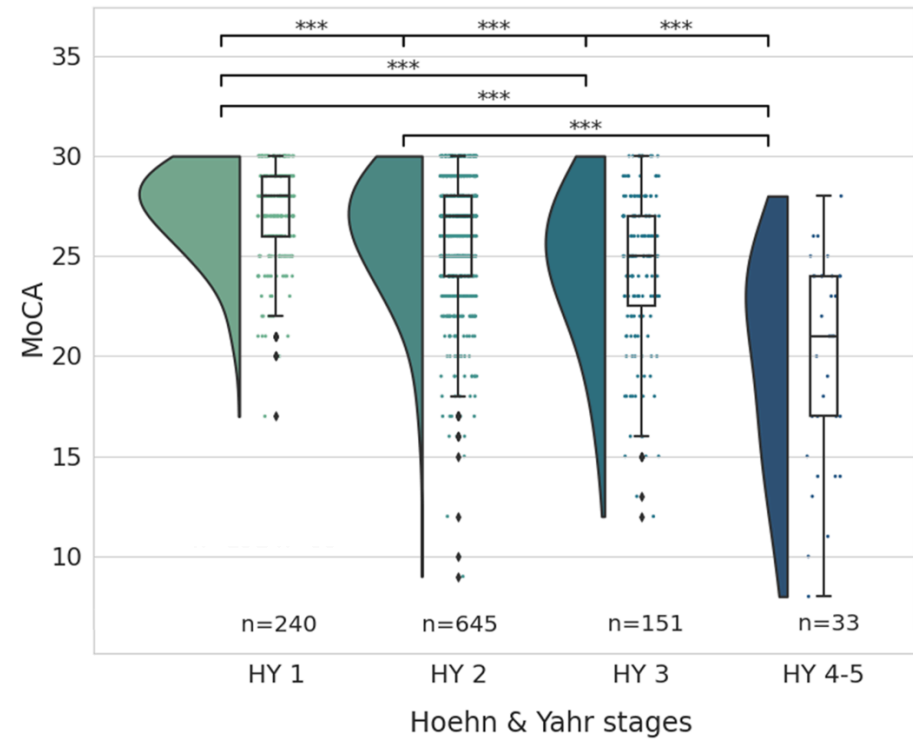

**Figure S3A-B. Group differences in time since diagnosis and MoCA across HY stage.**

(A) Time since diagnosis (in years) and (B) MoCA scores are shown for HY stages 1 to 4-5. Sample sizes are shown below the raincloud plots. \*\*\* indicates  $p < .001$ .

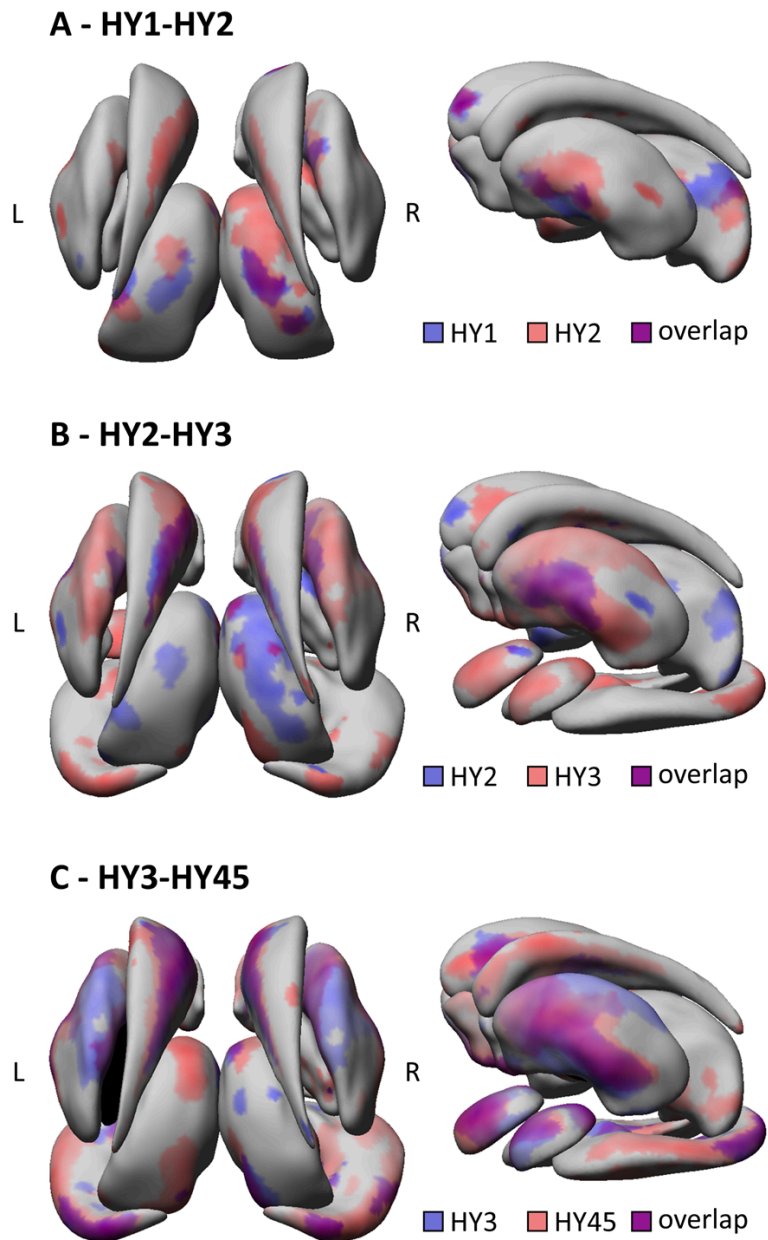

**Figure S4A-C. Pattern coherence analysis with spin permutation tests.**

Each panel shows the effect maps of two case-control mass univariate analyses are projected onto the subcortical regions to highlight overlapping patterns between the stages (purple), regardless of the direction of the effects. **(A)** HY1 vs controls (blue) and HY2 vs controls (pink), **(B)** HY2 vs controls (blue) and HY3 vs controls (pink), **(C)** HY3 vs controls (blue) and HY45 vs controls (pink).

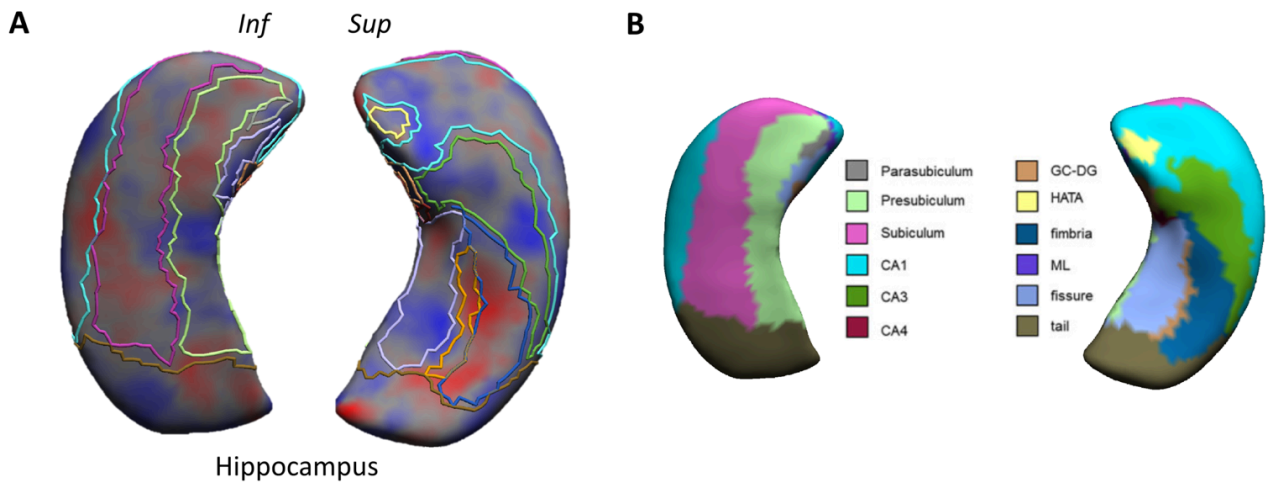

**Figure S5A-B. Hippocampal subregions on the ordinal classification maps.**

For visualization purposes, we overlaid subregions of the hippocampus according to the FreeSurfer v.6.0 hippocampal subfield atlas (mirrored) onto the effect maps from the ordinal classification model (**A**). The color codes from the hippocampal subregions are shown in (**B**).

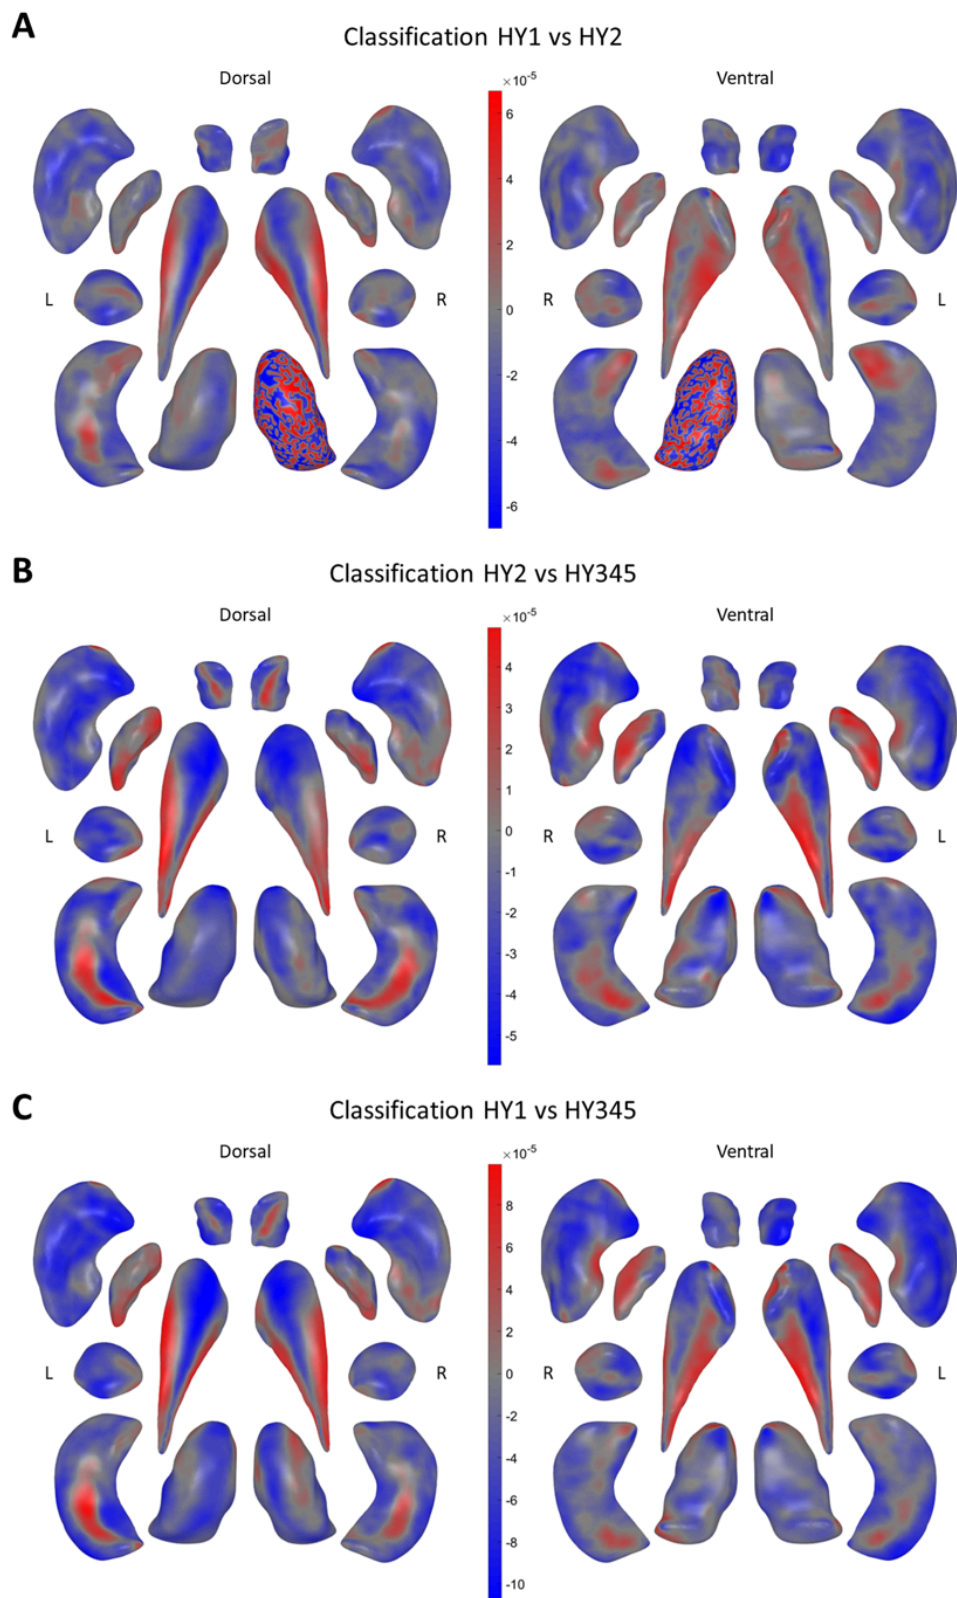

**Figure S6A-C. Machine learning binary classification of HY stages versus each other based on the thickness of subcortical structures.**

Classification maps of **(A)** HY1 vs HY2, **(B)** HY2 vs HY345, and **(C)** HY1 vs HY345 are shown. The color bars represent learned weights of the classification model, positive values (SD from the learned weights) in red, negative values in blue. More intense colors indicate stronger predictive power of the classification. Note that the right thalamus in panel **A** shows a biologically implausible pattern due to low signal.



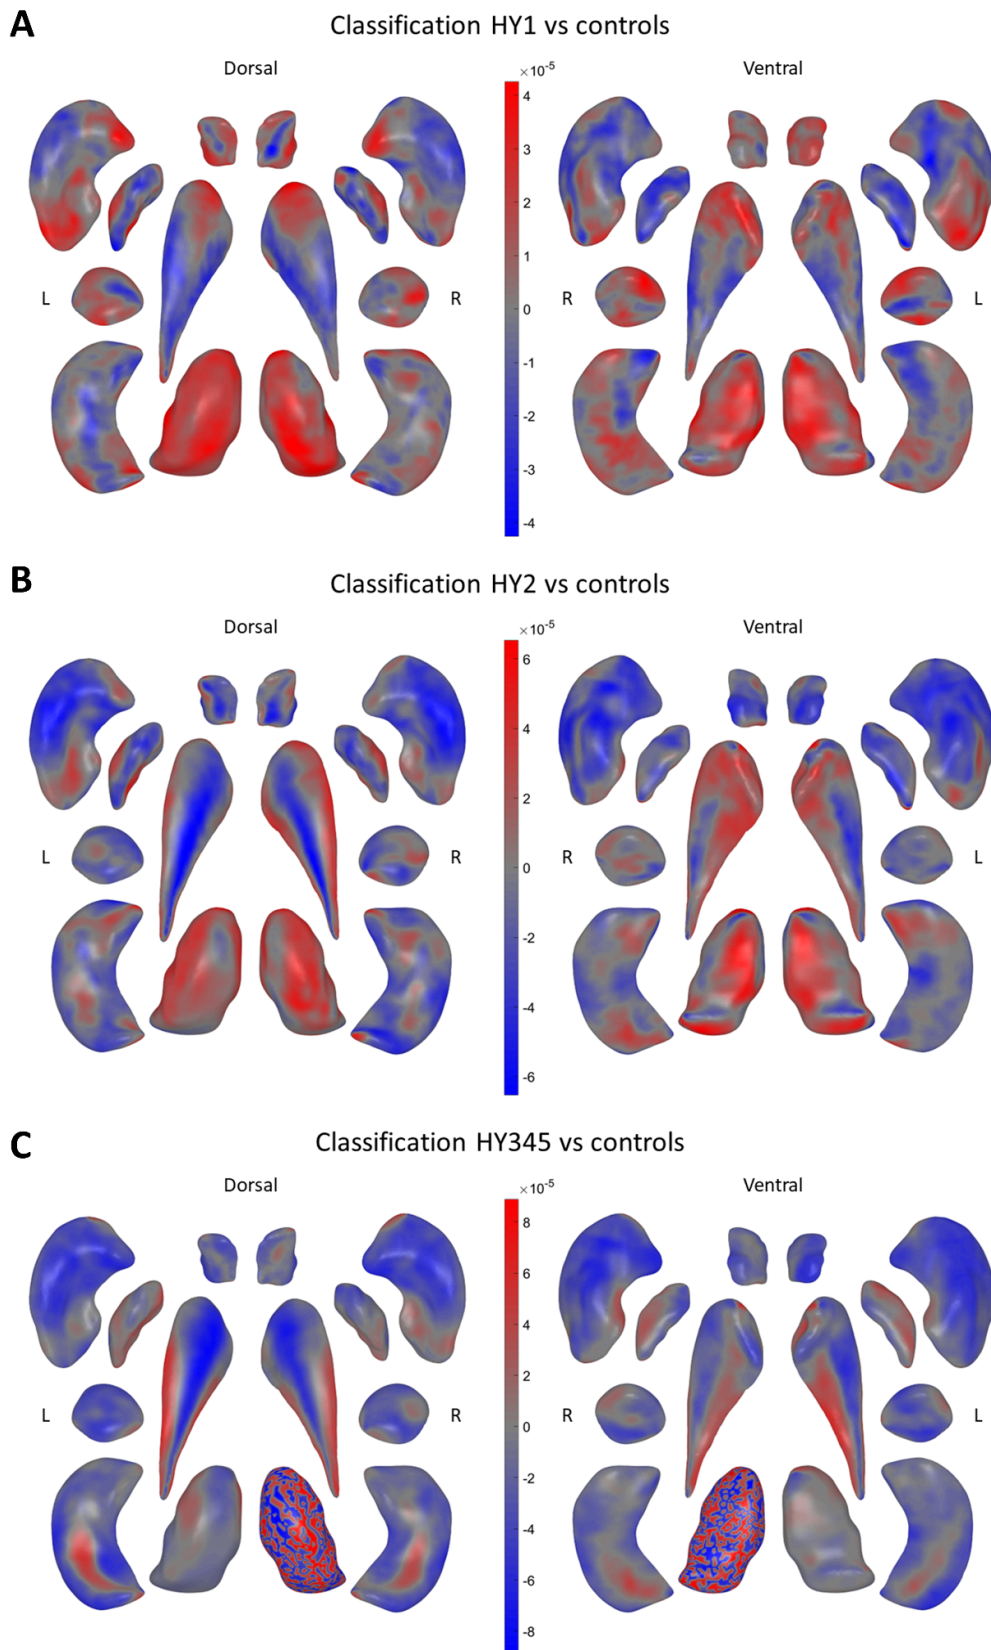

**Figure S7A-C. Machine learning: binary classification maps for HY stages versus controls.** Binary classification uses vertex-wise thickness information from all subcortical structures. The color bars represent learned weights of the classification model, positive values (SD from the learned weights) in red, negative values in blue. More intense colors indicate stronger predictive power of the classification. Displayed are the results of **(A-C)**

the binary classification of each of the HY stages versus controls. Note that the right thalamus in panel **C** shows a biologically implausible pattern due to low signal.

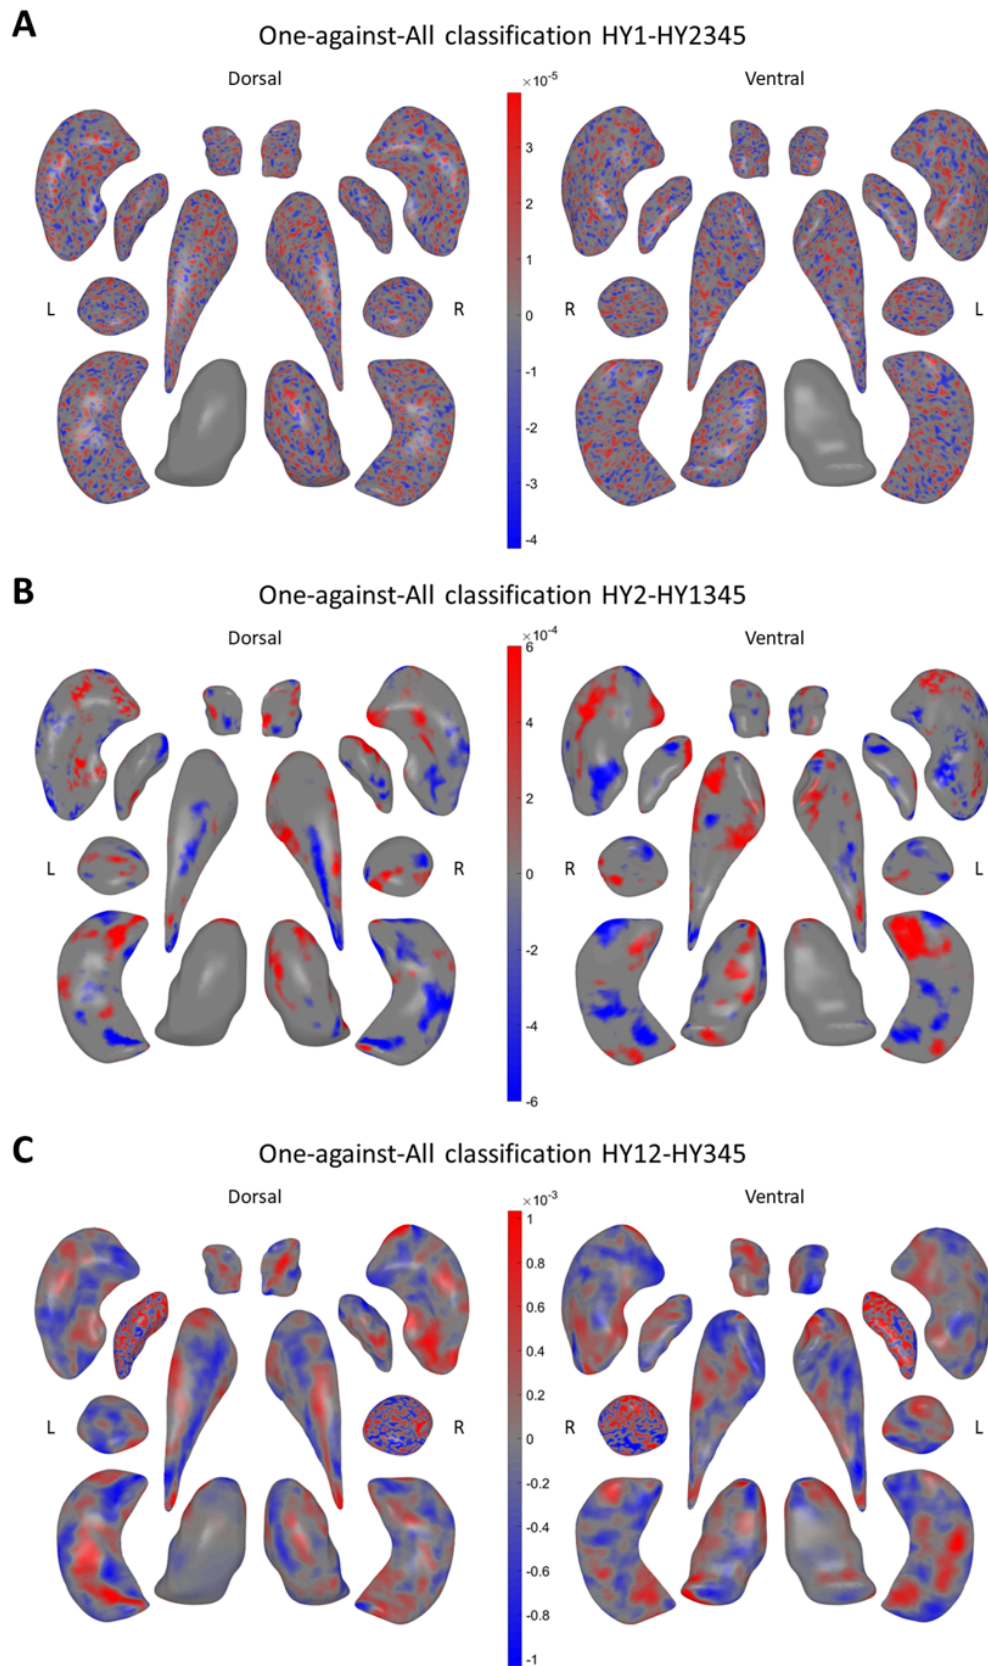

**Figure S8A-C. Machine learning: One-against-All classifications of the HY stages.**

One-against-All classification maps of (A) HY1, (B) HY2, and (C) HY345 are shown. The color bars represent learned weights of the classification model, positive values (SD from the learned weights) in red, negative values in blue. More intense colors indicate stronger predictive power of the classification. Note that all structures except for the left thalamus in panel A and the left globus pallidus and right amygdala in panel C show a biologically implausible pattern due to low signal.

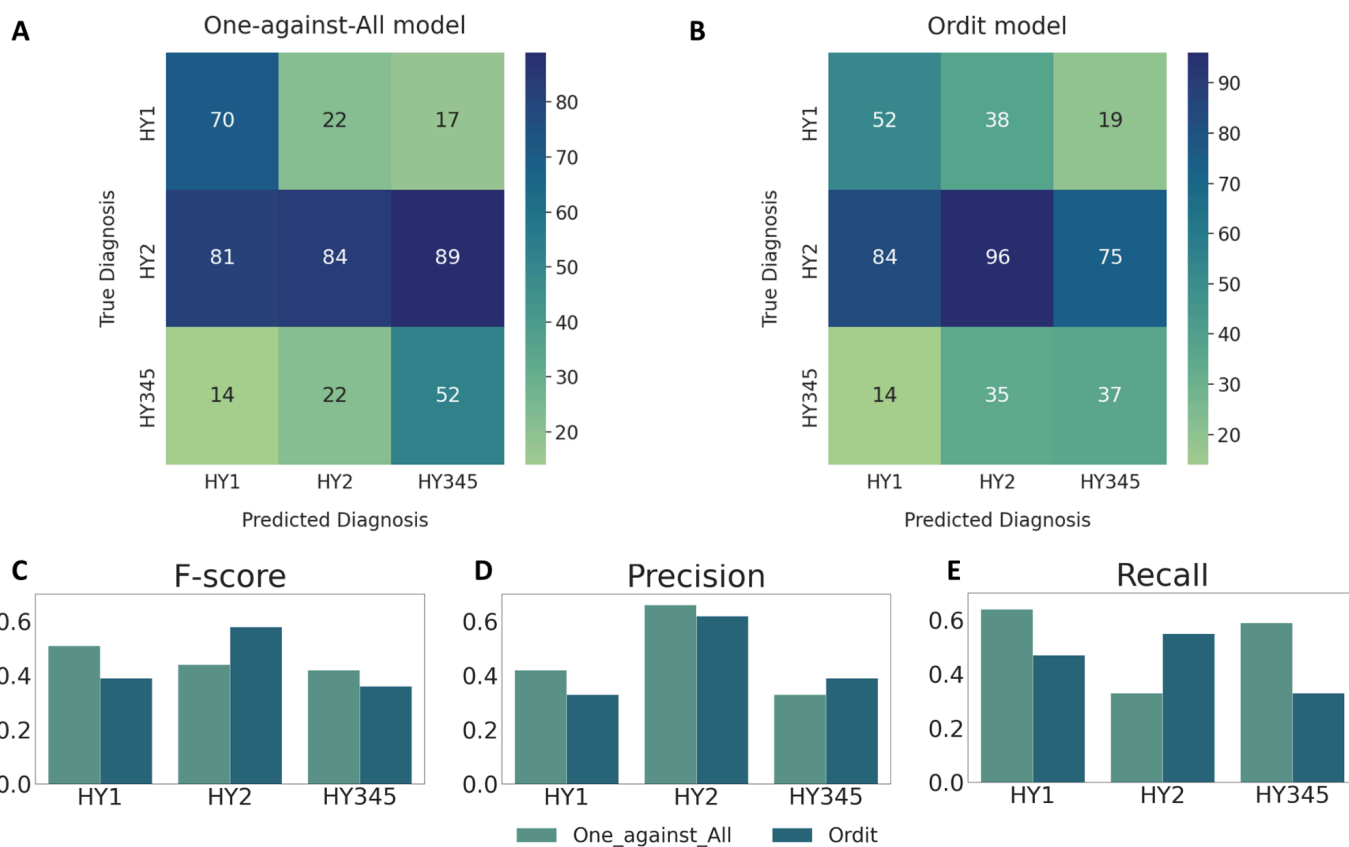

**Figure S9A-E. Machine learning: model comparison One-against-All and Ordit.**

This figure features a comparison of the multi-task classification performance of One-against-All and Ordit models. It is noteworthy that although the two models' predictive performance scores are comparable (with chance performance of 0.33), Ordit results in a relatively more balanced confusion matrix (AB, Table 2) and balanced scores across all classification metrics (C-E, Table 2). The collection of anatomical maps representing the One-against-All model is more difficult to interpret than the single Ordit-TVLI model map, in part because the grouping of different diagnostic categories together does not necessarily reflect the direction of PD-related anatomical change once the disease onset has occurred. Confusion matrices of the (A) One-against-All, and (B) Ordit models are shown. The ordinal model classifies the plurality of subjects in each HY stage correctly, unlike the One-against-All model. In each row the proportion of misclassified stages is approximately the same due to class-balancing. This is visualized by the diagonal carrying the biggest number. In the lower panels, (C) F-score, (D) precision, and (E) recall are compared between the two models for each HY stage. The corresponding values of performance parameters are provided in Table S13.

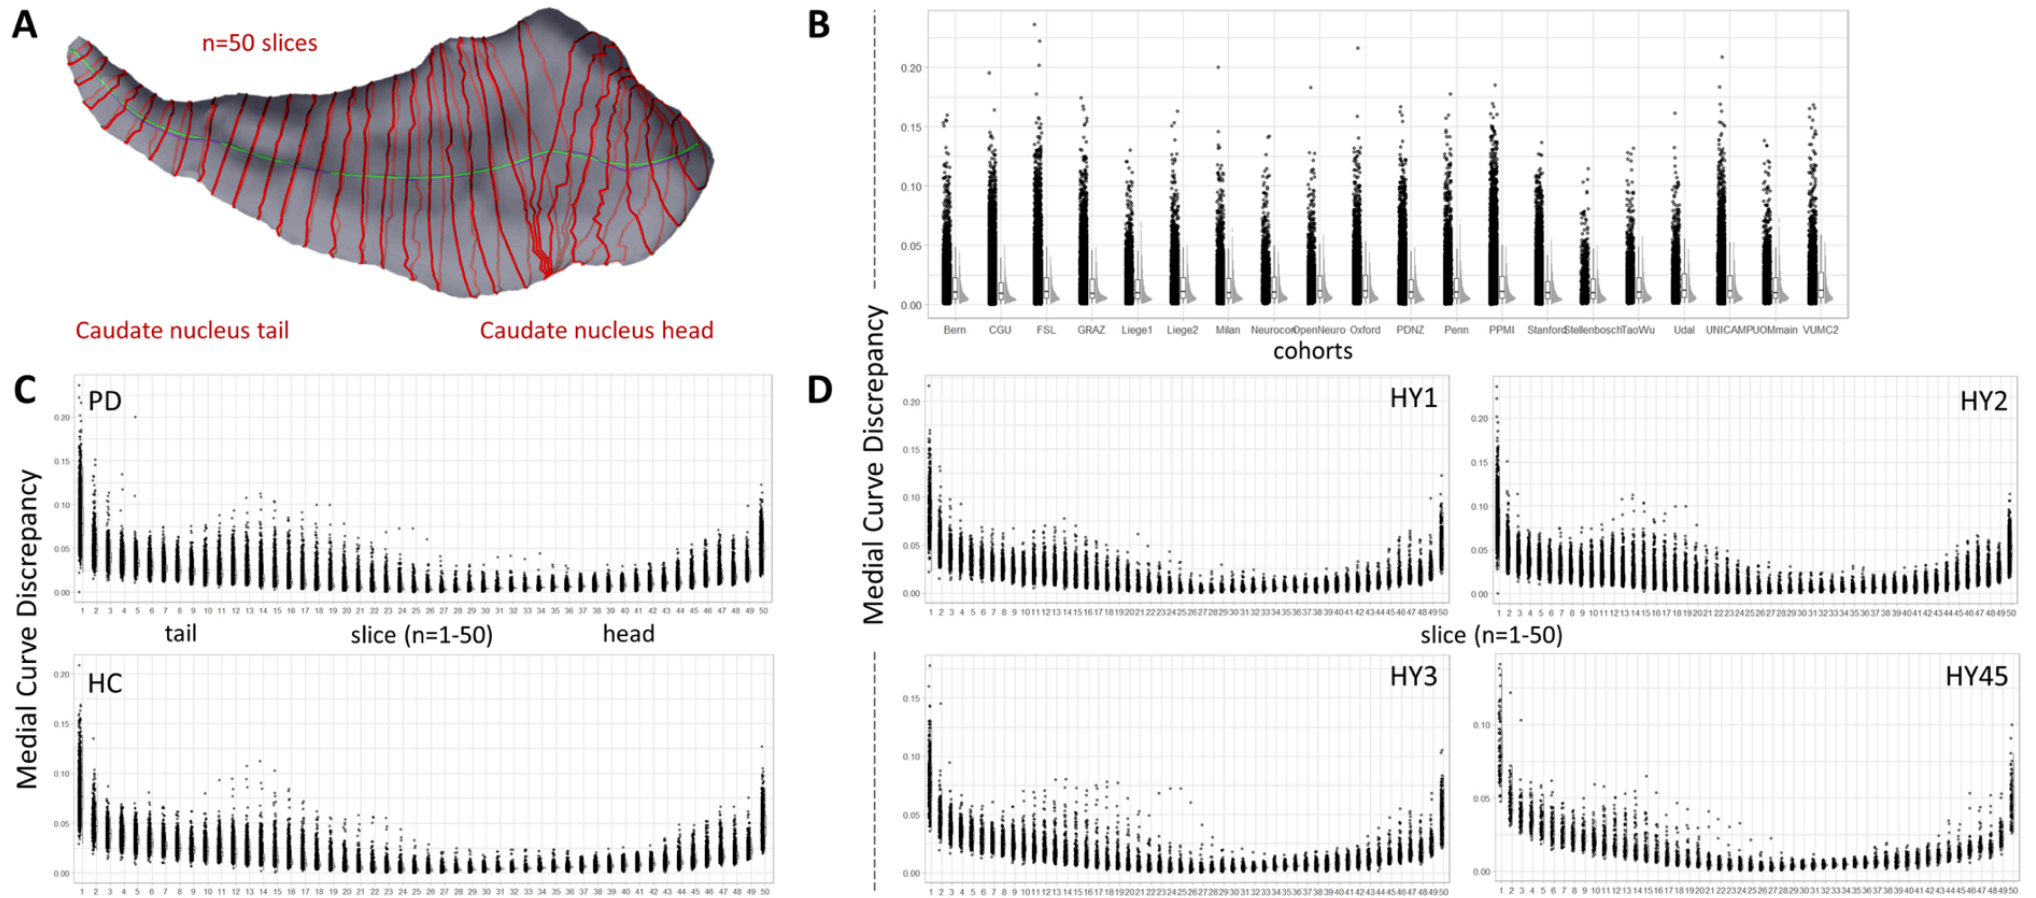

**Figure S10A-D. Caudate nucleus medial curve discrepancies along its longitudinal axis.**

The pattern of PD vs. controls shape differences in the caudate nucleus revealed by the binary classifiers suggests a “pancaking” effect: an apparent compression along the sagittal axis coupled with an apparent expansion along the axial direction in PD patients relative to controls (Figure 4A, Figure S6A-C). We performed a post hoc analysis to investigate whether this pattern could be caused by some bias in the medial curve. One plausible source of bias is possibly due to the curvature regularization used in fitting the curve. In general, if the overall shape of a region is curved, the medial curve will be pushed towards the concave side of the structure by the regularization. Thus, if the effect of PD were a curving of the caudate nucleus, or if there was bias in segmentation failure of the caudate nucleus in FreeSurfer, this could possibly result in an apparent flattening effect. To check this, we computed the difference between each point on the medial curve and the “true” medial point based on the cross-section of each subject’s

caudate nucleus shape at a given location. In this figure, medial curve discrepancies reflect the difference between the medial curve and “true” medial point along the caudate nucleus at 50 slice locations. The medial curve and “true” medial points are shown for **(A)** one subject (I-D “bias” map) and **(B)** did not differ significantly between sites, **(C)** PD and controls, or **(D)** the HY stages. The result was a I-D “bias” map for each subject **(A)**. These results give more credibility to the observed flattening effect in PD indicated by the shape map.

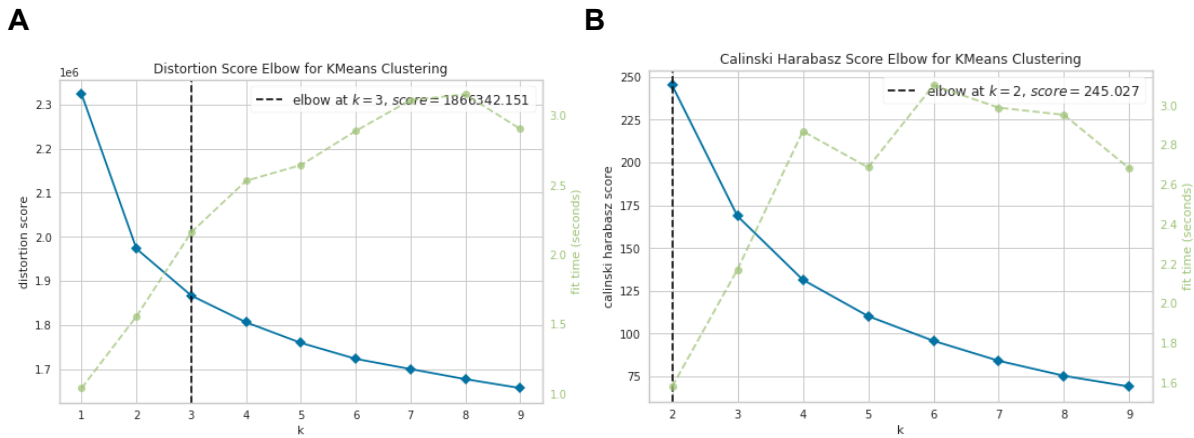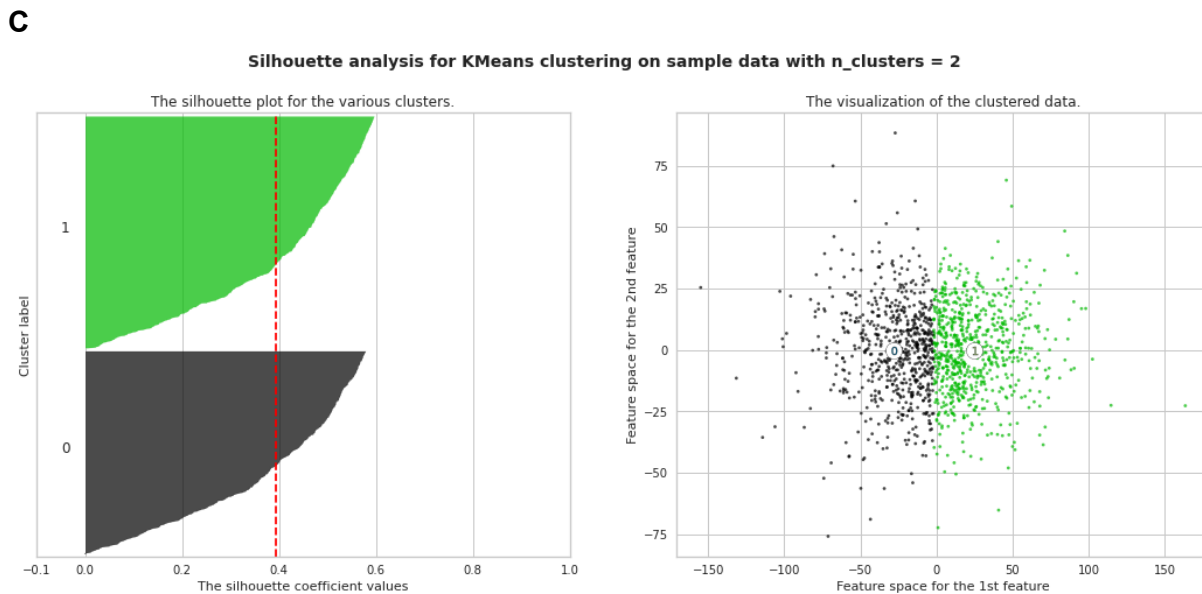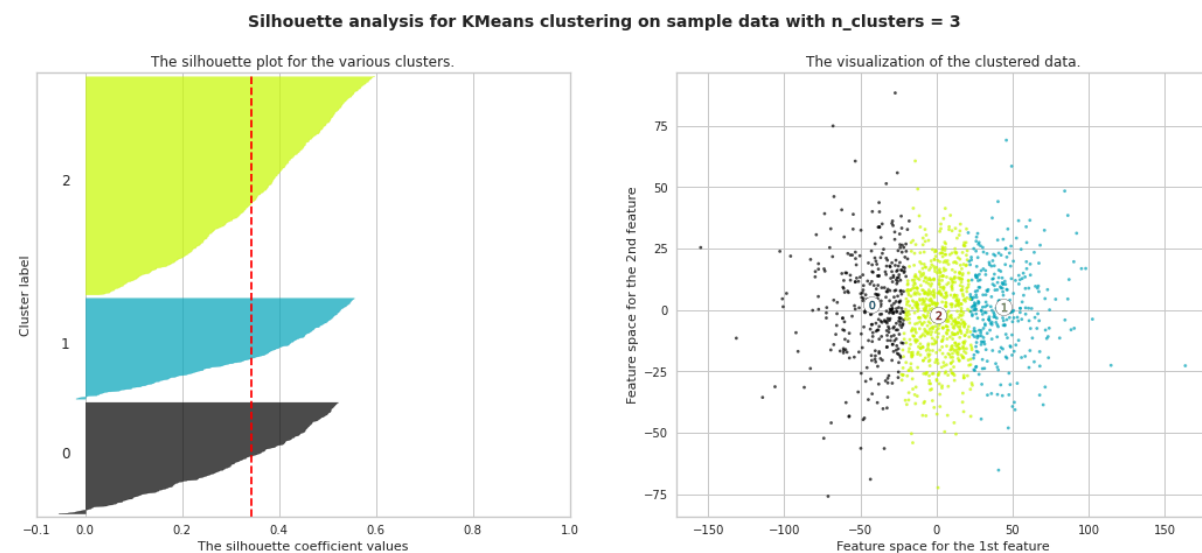

**Figure S1IA-C. K-means clustering: determining optimal k**

We performed k-means clustering (Python package scikit-learn 1.3.2) on the bilateral thalamus vertices in the combined HY1 and HY2 sample set to identify subgroups with shared morphological features. Ordinary least squares means was used to regress out explained variance of age, sex, ICV and cohort. Next, we applied the elbow and

Calinski-Harabasz method in KElbowVisualizer (package yellowbrick 1.5) and silhouette score (scikit-learn) to determine the optimal  $k$  clusters. Linear principal component analysis and k-means clustering was performed and identified clusters were statistically compared on clinical characteristics using t-tests and chi-squared tests. **(A)** Elbow method, **(B)** Calinsky-Harabasz method and **(C)** Silhouette method, including scatterplot of clustered data by the first and second principal component. The optimal  $k$  clusters indicated by the elbow method was two; and by the Calinski-Harabasz index and silhouette score three.

## ENIGMA-Parkinson's Disease Datasets

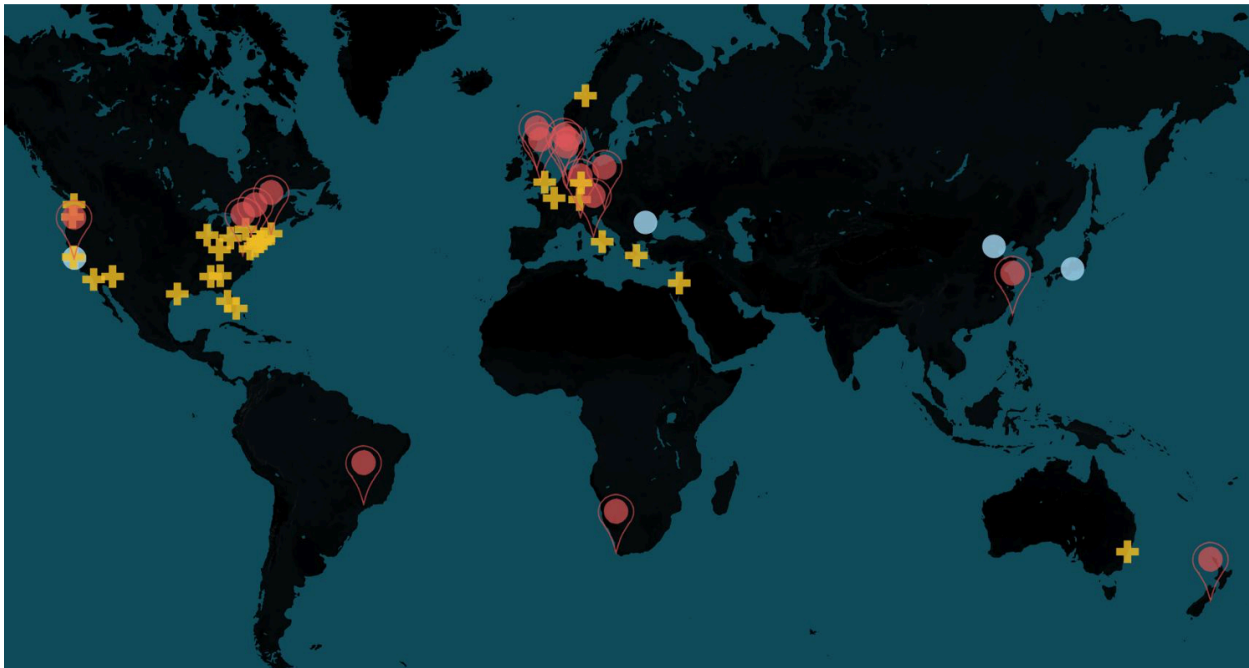

 ENIGMA-PD Sites

 PPMI Collection Sites

 Other Open Datasets

**Figure S12. World map of the ENIGMA-Parkinson's Disease Datasets.**

Locations of collaborating sites are indicated by red location drops, locations of the Parkinson's Progressive Marker Initiative (PPMI) datasets are indicated by a yellow plus sign, and other open datasets are indicated by a blue circle.



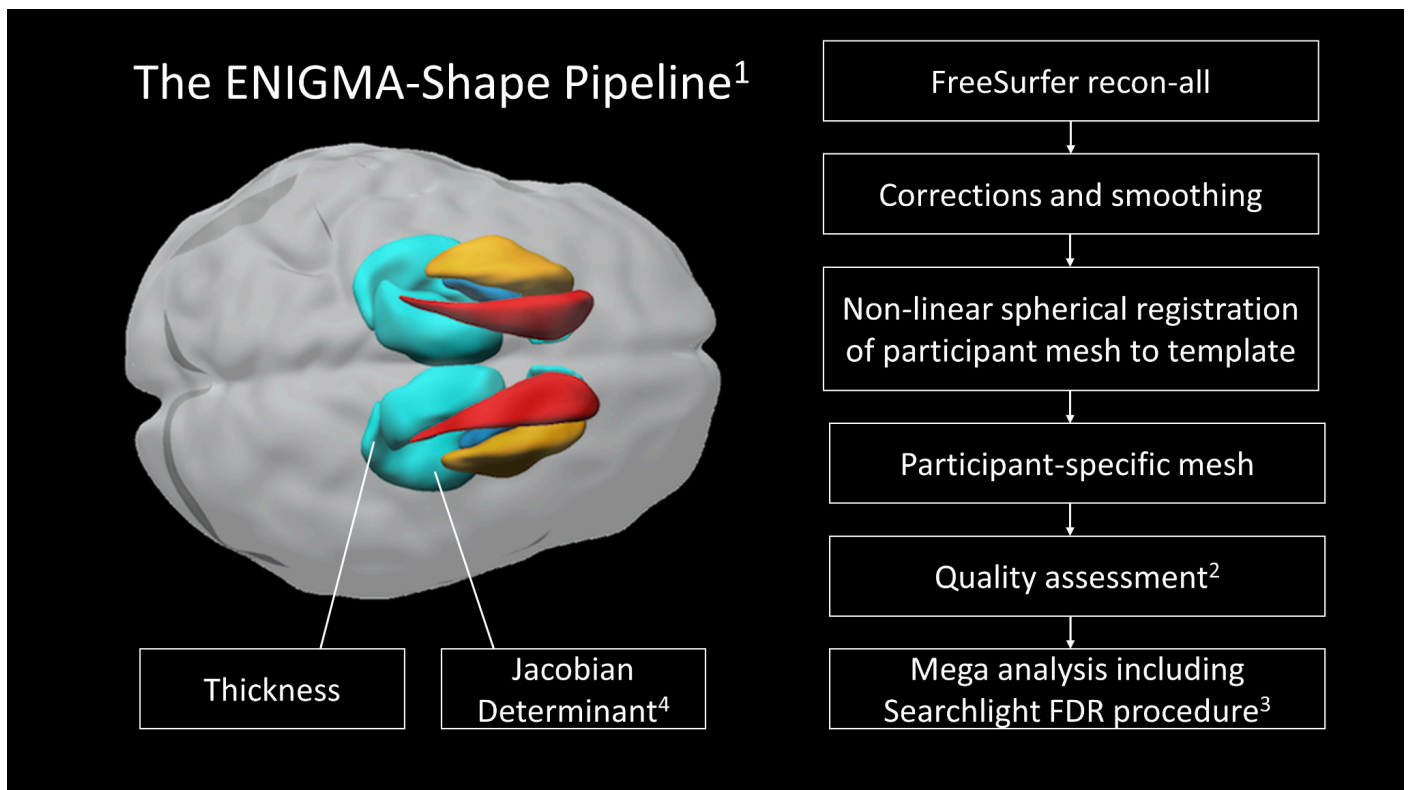

**Figure S13. The ENIGMA-Shape Pipeline.**

1) The ENIGMA-Shape pipeline uses a template based on subcortical structures from 200 young adults and has been applied to various conditions like major depressive disorder<sup>1</sup>, schizophrenia<sup>2</sup>, obsessive-compulsive disorder<sup>3</sup>, and 22q11.2 Deletion Syndrome<sup>4</sup>. Unlike cortical analysis, subcortical geometries remain relatively stable across ages in healthy adults, primarily varying by volume. Thus, we normalize features in subject-to-template registration to minimize age-related biases in the resulting shape descriptors. The first steps of the ENIGMA-Shape pipeline, including FreeSurfer parcellation<sup>5,6</sup>, performed by all source institutes individually. For each participant, we used non-linear spherical registration to align the surface with the template, creating a mesh representing the outer boundaries of the structure. These meshes were then pooled for quality assessment and mega-analysis. 2) Quality assessment entailed visual inspection of the meshes according to the ENIGMA-Shape protocol to assure anatomical accuracy, with exclusion of poorly segmented regions from the analysis. Mean imputation was performed for failed segmentations. We adjusted the overall logistic loss function by the inverse of the diagnostic or staging label frequency, to account for the imbalance in PD/control and HY stage group size. 3) In previous work<sup>2</sup>, we modified the searchlight FDR procedure<sup>7,8</sup> for global application across all structures in each linear model. Distances between vertices were defined as the Euclidean distance, with those between different structures set to infinity. The correction is more conservative than one that accounts for correlations between different regions but less conservative than the original FDR approach<sup>9</sup>, which ignores spatial correlation. 4) In this study, we focused on thickness as a shape morphometry measure as it offers intuitive interpretability in the context of neurodegeneration. We also analyzed the logarithm of the Jacobian determinant (Figure S14A-H), which reflects the ratio of two local surface areas: a surface patch on the participant and template surface<sup>10,11</sup>. Log-Jacobian values below 1 indicate surface contraction and values above 1 indicate expansion. The two measures of shape morphometry are considered complementary to each other (Figure S15A-C).

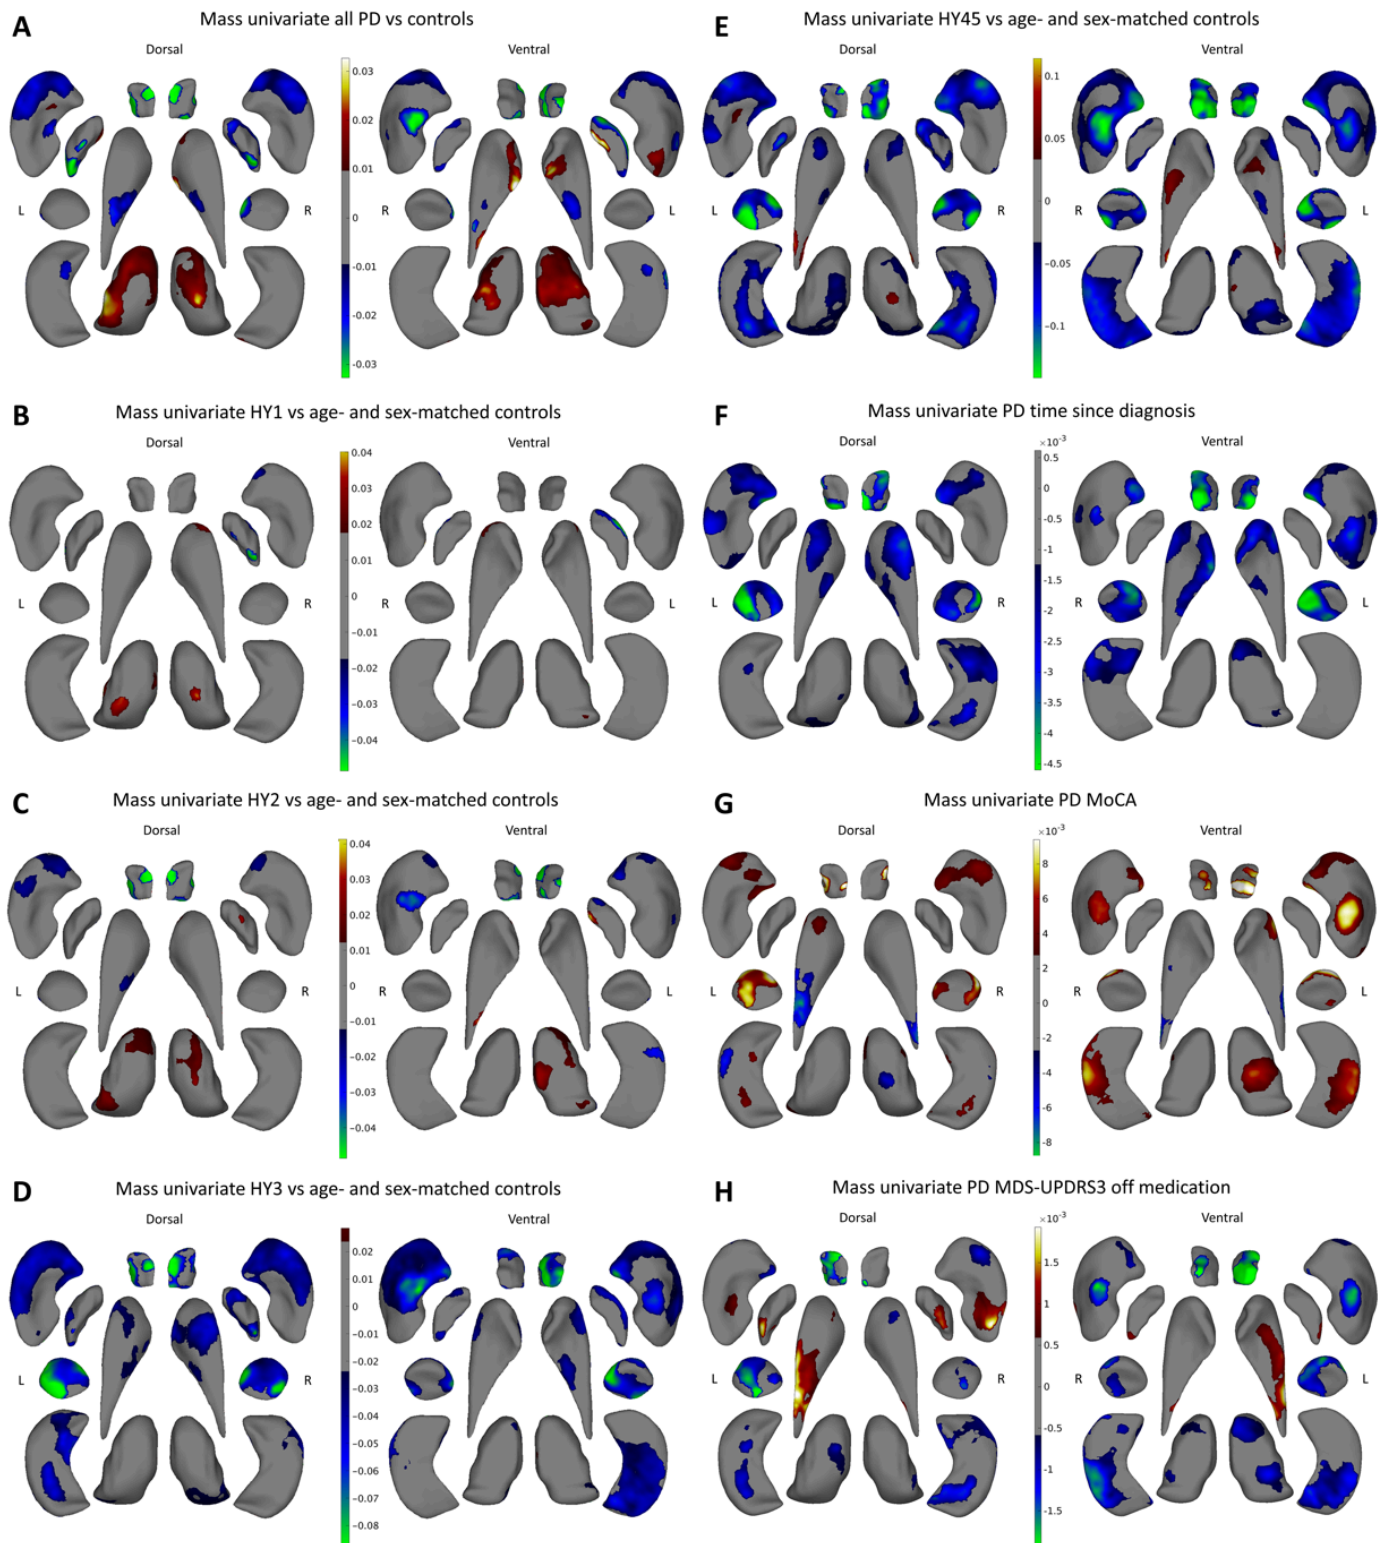

**Figure S14A-H. Mass univariate analysis: significant vertex-wise differences in Jacobian determinant between people with PD and controls.**

The patterns observed in the thickness analyses partly aligned with those observed in the Jacobian determinant analyses. The Jacobian determinant results are also presented in Table S13A-H. Conceptually, the Jacobian determinant and thickness differ in interpretability; whereas the Jacobian is an indirect reflection of surface expansion or contraction, the thickness values directly represent the absolute difference in tissue thickness. A comparison of both measures of shape deformation is visualized in Figure S15A-C. Effect maps are projected onto the subcortical regions showing the (A) PD versus controls, and (B-E) subgroup comparisons, and (F-H) correlations with clinical

markers. Positive b-values indicate that regions are thicker, negative b-values indicate that regions are thinner in PD compared to controls. (**B-E**) All HY groups are sex- and age-matched. (**A-H**) The models are corrected for intracranial volume and cohort in all panels, and additionally corrected for age and sex in panel **H**.

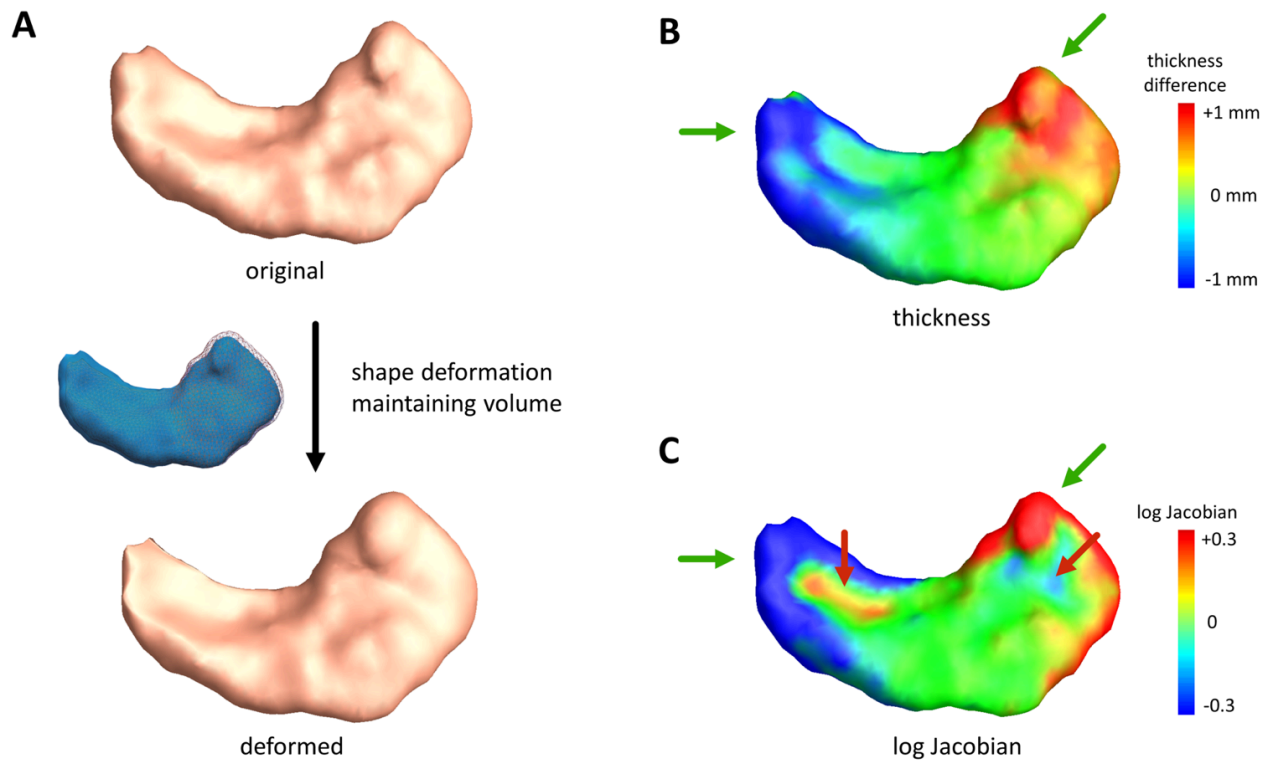

**Figure S15A-C. Comparison of log Jacobian versus thickness effects.**

Comparing the effects of a volume-preserving deformation (**A**) on thickness (**B**) and log Jacobian (**C**) measures in a hippocampal surface model. Notably, the direction of effect is concordant between the two measures in areas of positive curvature and discordant in areas of negative curvature. Another example is to imagine a stretching of the hippocampus along the main axis. The thickness would remain unchanged, while the jacobian would increase. The arrows in panels **B** and **C** highlight similarities (green) and differences (red) between the two measures of shape deformation.

## Supplementary References (cited in this supplement)

1. Ho, T. C. *et al.* Subcortical shape alterations in major depressive disorder: Findings from the ENIGMA major depressive disorder working group. *Hum. Brain Mapp.* **43**, 341–351 (2022).
2. Gutman, B. A. *et al.* A meta-analysis of deep brain structural shape and asymmetry abnormalities in 2,833 individuals with schizophrenia compared with 3,929 healthy volunteers via the ENIGMA Consortium. *Hum. Brain Mapp.* **43**, 352–372 (2022).
3. Fouche, J.-P. *et al.* Shape analysis of subcortical structures in obsessive-compulsive disorder and the relationship with comorbid anxiety, depression, and medication use: A meta-analysis by the OCD Brain Imaging Consortium. *Brain Behav.* **12**, e2755 (2022).
4. Ching, C. R. K. *et al.* Mapping Subcortical Brain Alterations in 22q11.2 Deletion Syndrome: Effects of Deletion Size and Convergence With Idiopathic Neuropsychiatric Illness. *Am. J. Psychiatry* **177**, 589–600 (2020).
5. Dale, A. M., Fischl, B. & Sereno, M. I. Cortical surface-based analysis. I. Segmentation and surface reconstruction. *Neuroimage* **9**, 179–194 (1999).
6. Gutman, B. A., Madsen, S. K., Toga, A. W. & Thompson, P. M. A Family of Fast Spherical Registration Algorithms for Cortical Shapes. in *Multimodal Brain Image Analysis* 246–257 (Springer International Publishing, 2013).
7. Kriegeskorte, N., Goebel, R. & Bandettini, P. Information-based functional brain mapping. *Proc. Natl. Acad. Sci. U. S. A.* **103**, 3863–3868 (2006).
8. Langers, D. R. M., Jansen, J. F. A. & Backes, W. H. Enhanced signal detection in neuroimaging by means of regional control of the global false discovery rate. *Neuroimage* **38**, 43–56 (2007).
9. Hochberg, Y. & Benjamini, Y. More powerful procedures for multiple significance testing. *Stat. Med.* **9**, 811–818 (1990).
10. Gutman, B. A. *et al.* Medial Demons Registration Localizes The Degree of Genetic Influence Over Subcortical Shape Variability: An N= 1480 Meta-Analysis. *Proc. IEEE Int. Symp. Biomed. Imaging* **2015**, 1402–1406 (2015).
11. Wang *et al.* Surface-based TBM boosts power to detect disease effects on the brain: an N= 804 ADNI study. *Neuroimage* (2011).
